# Supplementary material
Source: publisher figshare collection journal article supplement (https://gsajournals.figshare.com/ndownloader/files/15459545)
Supplement: Supplementary file 1 [file 15459545]

## Sheet: PM, Sb, miscCountries
24	564	23	15	50	15	61	12	25	36	17	27	15	68	28	5	10	27	19	19	29	32	20	9	10	15
Scoring			SbCV	SbSH	SbSHA	SbBR	SbBRA	PMCV	PMSH	PMSHA	PMmSH	PMmSHA	PMBR	PMBRA	PMBH	PMBHA	SbLr	Trop jap	PMOr	SEAOr	KN	PHI	JV	BN	SW
Sample	Pop	RM116		RM232		RM224		RM3431		RM210		RM005		RM171		RM488		RM215		RM146		RM421		RM283		RM623		RM517		RM234		RM231		RM021		RM490		RM106		RM345		RM239		RM124		RM133		RM109
SH-SBNTH21BWCV	SbCV01	279	279	156	156	152	152	166	166	151	151	110	110	334	345	192	192	147	147	333	333	243	243	152	152	334	334	260	260	153	153	185	185	164	164	88	88	291	291	169	169	142	142	265	265	228	228	85	85
BR-SBMKCV01	SbCV02	277	277	156	156	154	154	156	156	155	155	110	110	345	345	184	184	149	149	333	333	243	243	152	152	336	336	260	260	153	153	185	185	168	168	100	100	294	294	169	169	143	143	265	265	228	228	85	85
BR-SBNTCV03	SbCV03	277	277	158	158	155	155	166	166	157	157	108	108	324	324	170	170	147	147	333	333	243	243	152	152	334	334	260	260	153	153	166	166	160	160	90	90	288	288	169	169	143	143	267	267	230	230	89	89
BR-SBNTCV05	SbCV04	277	277	158	158	133	133	166	166	153	153	110	110	345	345	170	170	149	149	333	333	243	243	152	152	336	336	260	260	163	163	166	166	166	166	94	94	294	294	169	169	142	142	265	265	228	228	93	93
SH-SBKSCV01	SbCV05	277	279	146	150	154	154	151	166	160	160	110	110	325	325	192	192	145	145	333	333	243	243	152	152	351	351	260	278	151	151	169	185	164	164	90	90	288	288	169	169	142	142	265	265	230	230	93	93
SH-SBLBCV04	SbCV06	277	277	156	156	154	154	156	156	155	155	110	110	345	345	170	170	147	147	333	333	243	243	152	152	336	336	260	260	153	153	185	185	168	168	100	100	294	294	169	169	143	143	265	265	228	228	85	85
SH-SBLBCV05	SbCV07	279	279	158	158	151	151	156	156	151	151	110	110	345	345	172	172	147	147	333	333	243	243	160	160	334	334	278	278	153	153	185	185	0	0	100	100	288	288	169	169	145	145	265	265	230	230	95	95
SH-SBLBCV23	SbCV08	0	0	156	156	155	155	156	156	155	155	108	108	345	345	170	170	147	147	333	333	243	243	152	152	334	334	260	260	155	155	167	167	168	168	90	90	288	288	169	169	143	143	265	265	230	230	89	89
SH-SBMKCV02	SbCV09	279	279	158	158	152	152	156	156	153	153	108	108	349	349	170	170	147	147	333	333	243	243	160	160	334	334	278	278	153	153	169	169	128	128	104	104	288	288	169	169	145	145	265	265	230	230	95	95
SH-SBMKCV04	SbCV10	279	279	158	158	152	152	156	156	153	153	110	110	345	345	170	170	145	145	333	333	243	243	160	160	334	334	260	260	147	153	147	169	128	128	104	104	288	288	169	169	143	143	265	265	230	230	95	95
SH-SBMSCV01	SbCV11	277	277	156	156	154	154	155	155	153	153	110	110	345	345	170	170	147	147	333	333	243	243	152	152	336	336	260	260	153	153	185	185	164	164	88	88	291	291	169	169	142	160	265	265	228	228	85	85
SH-SBNTCV01	SbCV12	279	279	164	164	154	154	156	156	153	153	108	108	345	345	170	170	149	151	333	333	243	243	152	152	336	336	260	260	151	153	166	166	168	168	88	88	288	288	169	169	143	143	265	265	230	230	89	89
SH-SBTACV01	SbCV13	277	277	156	156	152	152	166	166	153	153	104	104	345	345	192	192	147	147	333	333	243	243	152	152	334	334	260	260	155	155	185	185	160	160	88	88	294	294	169	169	143	143	265	265	228	228	89	89
SH-SBTTCV01	SbCV14	277	277	156	156	154	154	156	156	157	157	110	110	345	345	170	170	147	147	333	333	243	243	152	152	336	336	260	260	153	153	185	185	168	168	100	100	294	294	169	169	143	143	265	265	228	228	85	85
SH-SBTTCV03	SbCV15	279	279	158	158	151	151	156	156	153	153	110	110	345	345	170	170	145	145	333	333	243	243	160	160	334	334	260	260	153	153	171	171	128	128	104	104	288	288	169	169	143	143	265	265	230	230	95	95
SH-SBBG15	SbSH01	281	281	158	158	155	155	166	166	157	157	104	104	324	324	178	178	145	145	333	333	243	243	152	152	342	342	278	278	153	153	195	195	152	152	100	100	294	294	169	169	141	141	267	267	230	230	89	89
SH-SBBG17	SbSH02	281	281	158	158	155	155	166	166	157	157	104	104	324	324	178	178	145	145	333	333	243	243	152	152	342	342	278	278	153	153	195	195	152	152	100	100	294	294	169	169	142	142	267	267	230	230	89	89
SH-SBBG26	SbSH03	279	279	158	158	152	152	156	156	153	153	110	110	345	345	170	170	147	147	333	333	243	243	160	160	334	334	260	260	153	153	169	169	127	127	104	104	288	288	169	169	142	142	265	265	230	230	95	95
SH-SBBG35	SbSH04	277	277	144	144	154	154	166	166	153	153	110	110	345	345	170	170	147	147	333	333	243	243	150	150	336	336	278	278	153	153	169	169	162	162	94	94	294	294	169	169	143	143	265	265	230	230	89	89
SH-SBKS01	SbSH05	279	279	156	156	152	152	166	166	153	153	110	110	345	345	148	192	147	147	333	333	243	243	152	152	334	334	260	260	153	153	185	185	166	166	88	88	291	291	169	169	144	144	265	265	228	228	83	83
SH-SBKS05	SbSH06	277	277	150	150	156	156	151	151	160	160	110	110	325	325	170	170	145	145	333	333	243	243	148	148	334	334	262	262	151	151	169	169	158	158	104	104	288	288	169	169	142	142	267	267	230	230	93	115
SH-SBKS06	SbSH07	277	277	156	156	156	156	151	151	153	153	112	112	325	325	148	186	147	147	333	333	243	243	148	148	334	334	262	262	153	153	193	193	129	129	104	104	288	288	169	169	142	142	267	267	230	230	93	115
SH-SBKS07	SbSH08	279	279	156	156	152	152	166	166	153	153	110	110	345	345	192	192	147	147	333	333	243	243	152	152	334	334	260	260	153	153	185	185	164	164	88	88	291	291	169	169	142	142	265	265	228	228	85	85
SH-SBLB01	SbSH09	277	277	158	158	133	133	166	166	159	159	110	110	345	345	170	170	147	147	333	333	243	243	152	152	334	334	278	278	153	153	185	185	158	158	100	100	294	294	169	169	144	144	267	267	230	230	89	89
SH-SBLB04	SbSH10	279	279	158	158	136	136	166	166	153	153	110	110	345	345	192	192	147	147	333	333	243	243	152	152	336	336	262	262	153	153	185	185	164	164	88	88	294	294	169	169	142	142	267	267	228	228	85	85
SH-SBLB08	SbSH11	0	0	158	158	155	155	166	166	155	155	110	110	345	345	170	170	145	145	333	333	243	243	152	152	334	334	278	278	155	155	187	187	154	154	104	104	288	288	169	169	143	143	267	267	230	230	89	89
SH-SBLB21	SbSH12	279	279	140	140	155	155	151	151	151	151	110	110	345	345	170	170	147	147	333	333	243	243	152	152	334	334	260	260	151	151	169	169	129	129	100	100	288	288	169	169	142	142	267	267	230	230	89	89
SH-SBLB25	SbSH13	0	0	140	140	155	155	152	152	151	151	110	110	345	345	148	148	145	145	333	333	245	245	152	152	334	334	278	278	153	153	185	185	130	130	100	100	285	297	169	169	143	143	267	267	230	230	89	89
SH-SBMK01	SbSH14	277	277	158	158	154	154	166	166	157	157	110	110	345	345	170	170	149	149	333	333	243	243	152	152	336	336	260	260	163	163	166	166	166	166	100	100	294	294	169	169	142	142	265	265	230	230	81	95
SH-SBMK03	SbSH15	279	279	156	156	152	156	151	166	153	153	112	112	325	334	170	170	147	147	333	333	243	243	148	152	334	334	260	282	151	151	185	193	164	164	88	104	288	291	169	169	142	170	265	267	228	230	85	85
SH-SBMK04	SbSH16	277	277	158	158	154	154	166	166	155	155	108	108	345	345	170	170	147	147	333	333	243	243	152	152	338	338	260	260	165	165	185	185	0	0	88	88	288	288	169	169	143	143	265	265	228	228	97	97
SH-SBMK05	SbSH17	277	277	158	158	154	154	166	166	157	157	110	110	345	345	170	170	147	147	333	333	243	243	152	152	336	336	260	260	163	163	166	166	166	166	100	100	294	294	169	169	143	143	265	265	230	230	85	85
SH-SBMK07	SbSH18	279	279	156	156	152	152	166	166	153	157	110	110	345	345	192	192	147	147	333	333	243	243	152	152	336	336	260	260	153	153	185	185	164	164	88	88	291	291	169	169	142	142	265	265	228	228	83	83
SH-SBMK12	SbSH19	277	277	158	158	154	154	166	166	157	157	110	110	345	345	170	170	147	147	333	333	243	243	152	152	336	336	260	260	163	163	166	166	166	166	100	100	294	294	169	169	143	143	265	265	230	230	95	95
SH-SBMS03	SbSH20	279	279	158	158	152	152	156	156	153	153	110	110	345	345	170	170	147	147	333	333	243	243	160	160	334	334	260	260	153	153	169	169	127	127	104	104	288	288	169	169	142	142	265	265	230	230	95	95
SH-SBMS06	SbSH21	279	279	156	156	152	152	152	166	153	153	110	110	345	345	192	192	147	147	333	333	243	243	152	152	336	336	260	260	153	153	185	185	164	164	88	88	294	294	169	169	143	143	265	265	228	228	85	85
SH-SBMS09	SbSH22	279	279	156	156	151	151	166	166	153	153	110	110	345	345	192	192	145	145	333	333	243	243	154	154	336	336	260	260	153	153	185	185	164	164	88	88	294	294	169	169	143	143	265	265	228	228	85	85
SH-SBMS13	SbSH23	281	281	156	156	155	155	166	166	151	151	110	110	345	345	170	170	145	145	333	333	243	243	152	152	334	334	260	260	155	155	185	185	158	158	104	104	288	288	169	169	143	143	267	267	228	228	89	89
SH-SBMS22	SbSH24	277	277	158	158	154	154	166	166	157	157	108	108	324	324	170	170	145	145	333	333	243	243	152	152	334	334	260	260	153	153	166	166	160	160	90	90	285	285	169	169	143	143	267	267	230	230	89	89
SH-SBNT15	SbSH25	279	279	156	156	152	152	166	166	157	157	110	110	345	345	148	192	147	147	333	333	243	243	152	152	332	332	260	260	153	153	185	185	164	164	88	88	291	291	169	169	144	144	265	265	228	228	89	89
SH-SBNTH08	SbSH26	277	277	156	156	153	153	0	0	153	153	110	110	345	345	170	170	145	145	333	333	243	243	152	152	334	334	278	278	153	153	185	185	130	130	100	100	294	294	169	169	145	145	267	267	230	230	89	89
SH-SBNTH11	SbSH27	277	277	156	156	151	151	166	166	151	151	110	110	325	325	170	170	145	145	333	333	243	243	152	152	336	336	278	278	155	155	187	187	0	0	104	104	294	294	169	169	143	143	265	265	230	230	85	85
SH-SBNTH13	SbSH28	277	277	156	156	151	151	166	166	153	153	104	104	345	345	186	186	145	145	333	333	243	243	148	148	336	336	262	262	153	153	185	185	130	130	90	90	294	294	169	169	143	143	267	267	228	228	85	85
SH-SBNTH19	SbSH29	281	281	156	156	143	143	166	166	153	153	108	108	345	345	170	170	145	145	333	333	243	243	152	152	344	344	260	260	155	155	185	185	166	166	90	90	294	294	169	169	143	143	265	265	228	228	89	89
SH-SBNTH29	SbSH30	281	281	0	0	151	151	166	166	153	153	108	108	329	345	192	192	147	147	333	333	243	243	152	152	336	336	258	258	149	149	185	185	152	152	88	88	294	294	169	169	143	143	267	267	228	228	85	85
SH-SBNTH32	SbSH31	277	277	158	158	151	154	156	156	153	153	110	110	345	345	170	170	147	147	333	333	243	243	150	150	336	336	262	262	155	155	185	185	130	130	94	94	294	294	169	169	143	143	265	265	228	228	89	89
SH-SBTA08	SbSH32	279	279	156	156	154	154	156	156	155	155	110	110	345	345	170	170	149	149	333	333	243	243	152	152	335	335	260	260	153	153	185	185	168	168	100	100	294	294	169	169	143	143	265	265	228	228	85	85
SH-SBTA10	SbSH33	277	277	158	158	133	133	166	166	153	153	110	110	324	324	170	170	147	147	333	333	279	279	152	152	334	334	260	260	163	163	185	185	160	160	100	100	294	294	169	169	144	144	265	265	230	230	83	93
SH-SBTA11	SbSH34	277	277	156	156	151	151	166	166	153	153	112	112	345	345	186	186	145	145	333	333	243	243	154	154	342	342	260	260	155	155	185	185	160	160	88	88	288	288	169	169	143	143	265	265	228	228	89	89
SH-SBTA12	SbSH35	279	279	158	158	154	154	166	166	153	153	108	108	345	345	170	170	149	149	333	333	243	243	152	152	334	334	260	260	153	153	166	166	160	160	94	94	288	288	169	169	143	143	267	267	230	230	91	91
SH-SBTA14	SbSH36	277	277	156	156	152	152	166	166	153	153	104	104	345	345	192	192	145	147	333	333	243	243	152	152	334	334	260	260	155	155	185	185	168	168	88	88	294	294	169	169	143	143	265	265	228	228	91	91
SH-SBTG02	SbSH37	277	277	140	140	120	120	166	166	155	155	110	110	324	324	170	170	145	145	333	333	243	243	152	152	335	335	260	260	153	153	185	185	168	168	100	100	288	288	169	169	143	143	265	265	230	230	89	89
SH-SBTT01	SbSH38	277	277	156	156	155	155	156	156	153	153	110	110	325	345	170	170	147	147	333	333	243	243	154	154	334	334	260	260	153	153	185	185	0	0	100	100	291	291	169	169	143	143	267	267	228	228	89	89
SH-SBTT04	SbSH39	279	279	156	156	154	154	152	152	155	155	110	110	345	345	170	170	147	147	333	333	243	243	153	153	336	336	260	260	151	151	167	167	0	0	88	88	294	294	169	169	143	143	265	265	228	228	89	89
SH-SBTT05	SbSH40	277	281	156	156	153	153	152	152	155	155	110	110	345	345	170	170	147	147	333	333	243	243	152	152	336	336	262	262	151	151	183	183	148	148	100	100	294	294	169	169	143	143	267	267	228	228	85	85
SH-SBTT06	SbSH41	277	277	156	156	149	152	156	156	153	153	110	110	345	345	170	170	145	145	333	333	231	231	0	0	351	351	0	0	0	0	0	0	164	164	0	0	294	294	169	169	143	143	265	265	228	228	85	85
SH-SBTT07	SbSH42	277	277	156	156	154	154	156	156	153	153	110	110	345	345	170	170	145	145	333	333	243	243	152	152	334	334	0	0	153	153	193	193	154	162	100	100	294	294	169	169	145	145	267	267	230	230	85	85
SH-SBTT08	SbSH43	0	0	156	156	155	155	152	152	151	151	112	112	325	325	148	148	145	145	333	333	245	245	153	153	334	334	264	264	153	153	183	183	152	152	104	104	285	285	169	169	143	143	267	267	228	228	93	93
SH-SBTT10	SbSH44	281	281	156	156	156	156	152	152	153	153	110	110	345	345	170	170	145	145	333	333	243	243	152	152	334	334	260	260	151	151	185	185	148	148	104	104	288	288	169	169	143	143	267	267	228	228	89	89
SH-SBTT15	SbSH45	0	0	158	158	155	155	156	156	153	153	110	110	345	345	170	170	147	147	333	333	243	243	152	152	336	336	258	258	155	155	185	185	168	168	100	100	285	285	169	169	143	143	267	267	230	230	85	85
SH-SBTT16	SbSH46	277	277	156	156	154	154	166	166	155	155	110	110	345	345	192	192	147	147	333	333	243	243	152	152	344	344	260	260	153	153	185	185	166	166	100	100	288	288	169	169	143	143	265	265	230	230	85	85
SH-SBTW03	SbSH47	277	277	158	158	133	154	166	166	151	151	104	110	345	345	170	178	147	149	333	333	243	243	152	152	336	336	260	260	153	153	185	185	156	160	100	100	294	294	169	169	142	142	265	265	230	230	95	95
SH-SBTW10	SbSH48	277	277	136	136	154	154	166	166	153	153	110	110	345	345	170	170	149	149	333	333	243	243	152	152	334	334	260	260	153	153	185	185	173	173	100	100	294	294	169	169	142	142	267	267	230	230	89	89
SH-SBTW16	SbSH49	279	279	140	156	152	152	166	166	153	153	104	104	324	345	192	192	147	147	345	345	243	243	152	152	334	334	278	278	153	153	185	185	164	164	100	100	288	288	169	169	143	143	267	267	228	228	95	95
SH-SBTW22	SbSH50	277	277	156	156	154	154	166	166	147	147	104	104	345	345	178	178	147	147	333	333	243	243	152	152	334	334	260	260	153	153	185	185	160	160	100	100	294	294	169	169	143	143	265	265	228	228	95	95
SHA-SBBG20	SbSHA01	279	279	156	156	154	154	166	166	157	157	110	110	345	345	170	170	151	151	333	333	243	243	152	152	334	334	260	260	153	153	166	166	160	160	100	100	288	288	169	169	144	144	269	269	228	228	87	113
SHA-SBBG23	SbSHA02	277	277	158	158	154	154	166	166	157	157	108	108	325	325	0	0	145	145	333	333	243	243	152	152	334	334	260	260	147	147	147	147	160	160	0	0	285	285	169	169	143	143	267	267	230	230	89	89
SHA-SBBG25	SbSHA03	279	279	158	160	154	154	166	166	151	151	110	110	345	345	170	170	151	151	333	333	243	243	152	152	336	336	260	260	153	153	185	185	160	160	100	100	288	294	169	169	144	144	267	267	228	228	85	113
SHA-SBBG43	SbSHA04	277	277	158	158	132	132	166	166	159	159	110	110	345	345	170	170	147	147	333	333	0	0	0	0	336	336	260	260	153	153	185	185	156	156	100	100	294	294	169	169	143	143	265	265	230	230	89	89
SHA-SBKS04	SbSHA05	277	277	146	146	154	154	166	166	157	157	110	110	324	324	170	170	145	147	333	333	279	279	152	152	336	336	260	260	153	153	169	169	160	160	100	100	294	294	169	169	142	142	267	267	230	230	85	85
SHA-SBMS10	SbSHA06	279	279	158	158	154	154	166	166	151	151	110	110	345	345	170	170	149	149	333	333	243	243	152	152	334	334	260	260	153	153	166	166	160	160	100	100	288	288	169	169	145	145	267	267	228	228	89	89
SHA-SBMS11	SbSHA07	279	279	156	156	154	154	166	166	151	151	110	110	345	345	170	170	151	151	333	333	243	243	152	152	334	334	260	260	153	153	166	166	160	160	100	100	288	288	169	169	144	144	267	267	228	228	89	89
SHA-SBMS15	SbSHA08	279	279	156	156	154	154	166	166	157	157	110	110	345	345	170	170	151	151	333	333	243	243	152	152	334	334	260	260	153	153	166	166	160	160	100	100	288	288	169	169	144	144	267	267	228	228	87	87
SHA-SBMS17	SbSHA09	279	279	156	156	154	154	166	166	151	151	110	110	345	345	170	170	151	151	333	333	243	243	152	152	334	334	260	260	153	153	166	166	129	129	100	100	288	288	169	169	144	144	267	267	228	228	87	87
SHA-SBMS23	SbSHA10	279	279	156	156	154	154	166	166	157	157	110	110	345	345	170	170	151	151	333	333	243	243	152	152	334	334	260	260	153	153	166	166	160	160	100	100	288	288	169	169	144	144	267	267	228	228	89	89
SHA-SBMS24	SbSHA11	279	279	156	156	154	154	150	166	151	151	110	110	341	361	153	170	151	151	333	333	243	243	152	152	334	334	260	260	153	153	166	166	160	160	100	100	288	288	169	169	144	144	267	267	228	228	89	89
SHA-SBNT14	SbSHA12	279	279	156	156	154	154	166	166	157	157	110	110	345	345	170	170	151	151	333	333	243	243	152	152	334	334	260	260	153	153	166	166	129	129	100	100	288	288	169	169	144	144	267	267	228	228	89	89
SHA-SBNT25	SbSHA13	279	279	156	156	154	154	166	166	157	157	110	110	345	345	170	170	151	151	333	333	243	243	152	152	334	334	260	260	153	153	166	166	129	129	100	100	288	288	169	169	144	144	267	267	228	228	89	113
SHA-SBTS02	SbSHA14	277	277	158	158	154	154	166	166	153	153	112	112	334	345	170	170	147	147	333	333	244	244	148	148	334	334	260	260	153	153	185	193	160	160	94	94	294	294	169	169	144	144	267	267	228	230	83	115
SHA-SBTS09	SbSHA15	277	277	146	146	152	152	156	156	153	153	110	110	345	345	192	192	145	145	333	333	243	243	152	152	334	334	278	278	153	153	191	191	162	162	90	90	288	288	169	169	142	142	267	267	228	228	89	89
BR-SBBG03	SbBR01	277	277	156	156	153	153	156	156	153	153	110	110	345	345	170	170	147	147	333	333	243	243	153	153	336	336	260	260	155	155	185	185	160	160	100	100	288	288	169	169	143	143	265	265	228	228	85	85
BR-SBBG09	SbBR02	279	279	156	156	136	136	166	166	153	153	104	104	345	345	186	186	145	145	333	333	243	243	154	154	336	336	260	260	155	155	185	185	164	164	88	88	294	294	169	169	143	143	267	267	228	228	85	85
BR-SBBG10	SbBR03	277	277	140	140	154	154	166	166	153	153	110	110	345	345	170	170	149	149	333	333	243	243	152	152	336	336	260	260	153	153	185	185	168	168	94	94	294	294	169	169	142	142	265	265	230	230	89	89
BR-SBBG11	SbBR04	277	277	156	156	154	154	156	156	151	151	104	104	345	345	178	178	147	147	333	333	243	243	152	152	334	334	260	260	155	155	185	185	160	160	100	100	294	294	169	169	143	143	265	265	228	228	81	95
BR-SBBG12	SbBR05	279	279	156	156	153	153	166	166	151	151	110	110	345	345	170	170	149	149	333	333	0	0	0	0	334	334	260	260	153	153	166	166	130	130	0	0	288	288	169	169	145	145	267	267	228	228	89	89
BR-SBBG18	SbBR06	277	277	158	158	154	154	166	166	157	157	108	108	321	321	153	170	147	147	333	333	243	243	152	152	334	334	260	260	153	153	166	166	160	160	90	90	288	288	169	169	142	142	267	267	230	230	89	89
BR-SBBG22	SbBR07	277	277	158	158	133	133	166	166	157	157	110	110	345	345	170	170	149	149	333	333	243	243	152	152	336	336	260	260	163	163	185	185	158	158	100	100	294	294	169	169	142	142	265	265	230	230	85	85
BR-SBBG24	SbBR08	277	277	158	158	154	154	166	166	157	157	108	108	324	324	170	170	147	147	333	333	243	243	152	152	334	334	260	260	153	153	166	166	160	160	90	90	288	288	169	169	142	142	267	267	230	230	89	89
BR-SBBG30	SbBR09	277	277	158	158	133	133	156	156	155	155	110	110	324	324	192	192	147	147	333	333	279	279	152	152	342	342	260	260	155	155	185	185	129	129	100	100	294	294	169	169	144	144	267	267	228	228	89	89
BR-SBBG48	SbBR10	277	279	140	156	154	154	166	166	153	153	104	104	345	345	186	186	147	149	333	333	243	243	152	152	336	336	260	260	153	153	185	185	164	166	88	88	294	294	169	169	143	143	265	267	230	230	85	85
BR-SBBG49	SbBR11	279	279	156	156	154	154	166	166	151	151	110	110	345	345	170	170	151	151	333	333	243	243	152	152	334	334	260	260	153	153	166	166	129	129	100	100	288	288	169	169	144	144	267	267	228	228	89	89
BR-SBKS02	SbBR12	277	277	156	158	154	154	166	166	155	155	112	112	345	345	170	170	147	147	333	333	243	243	148	152	334	336	260	260	153	153	166	193	166	166	94	100	294	294	169	169	143	143	267	267	230	230	83	83
BR-SBKS09	SbBR13	277	277	156	156	154	154	166	166	151	151	110	110	324	324	170	170	147	147	333	333	243	243	152	152	334	334	278	278	153	153	185	185	158	158	100	100	294	294	169	169	143	143	265	265	228	228	85	85
BR-SBLB02	SbBR14	277	277	158	158	136	136	166	166	153	153	104	104	345	345	186	186	147	147	333	333	243	243	148	148	336	336	262	262	153	153	185	185	129	129	94	94	294	294	169	169	143	143	267	267	228	228	83	83
BR-SBLB06	SbBR15	277	277	158	158	152	152	156	156	153	153	110	110	345	345	150	192	147	147	333	333	243	243	148	148	336	336	260	260	153	153	185	185	164	164	94	94	294	294	169	169	142	142	267	267	228	228	85	85
BR-SBLB13	SbBR16	277	277	156	158	154	154	156	156	153	157	108	110	345	345	170	170	147	149	333	333	243	243	152	152	337	337	260	260	153	153	166	185	152	156	88	94	288	294	169	169	142	142	265	267	230	230	85	91
BR-SBLB14	SbBR17	277	279	156	156	155	155	151	156	151	153	110	110	345	345	170	170	145	147	333	333	243	243	152	152	334	334	260	260	151	153	185	185	129	168	100	100	294	294	169	169	143	143	265	267	230	230	85	89
BR-SBLB15	SbBR18	279	279	158	158	152	152	166	166	153	153	110	110	345	345	192	192	147	147	333	333	243	243	152	152	336	336	260	260	153	153	185	185	164	164	88	88	294	294	169	169	143	143	265	265	228	228	85	85
BR-SBLB19	SbBR19	279	279	140	140	155	155	151	151	151	151	110	110	345	345	170	170	147	147	333	333	243	243	152	152	334	334	260	260	151	151	169	169	129	129	100	100	288	288	169	169	142	142	267	267	230	230	89	89
BR-SBLB20	SbBR20	279	279	156	156	156	156	151	151	153	153	104	104	345	345	170	170	147	147	333	333	243	243	152	152	334	334	260	260	151	151	185	185	148	148	104	104	288	288	169	169	142	170	267	267	228	228	89	89
BR-SBMK02	SbBR21	277	277	158	158	154	154	166	166	157	159	110	110	345	345	170	170	149	149	333	333	243	243	152	152	336	336	260	260	163	163	166	166	166	166	100	100	294	294	169	169	142	142	265	265	230	230	81	95
BR-SBMK06	SbBR22	277	277	156	156	153	153	166	166	153	153	110	110	345	345	186	186	145	145	333	333	243	243	152	152	336	336	260	260	153	153	185	185	164	164	100	100	294	294	169	169	143	143	267	267	230	230	89	89
BR-SBMK08	SbBR23	277	277	140	140	154	154	166	166	157	157	110	110	324	333	170	170	145	145	333	333	243	243	152	152	334	334	278	278	153	153	185	185	162	162	90	90	288	288	169	169	143	143	267	267	230	230	89	89
BR-SBMK09	SbBR24	277	277	158	158	154	154	166	166	157	157	108	108	324	324	170	170	147	147	333	333	243	243	152	152	334	334	260	260	153	153	166	166	160	160	90	90	288	288	169	169	143	143	267	267	230	230	89	89
BR-SBMK10	SbBR25	279	279	156	156	154	154	166	166	157	157	110	110	345	345	192	192	147	147	333	333	243	243	152	152	334	334	260	260	153	153	185	185	164	164	100	100	294	294	169	169	143	143	265	265	228	228	89	89
BR-SBMS01	SbBR26	277	277	158	158	154	154	166	166	157	157	108	108	324	324	170	170	147	147	333	333	243	243	152	152	334	334	260	260	153	153	166	166	160	160	90	90	288	288	169	169	143	143	267	267	230	230	89	89
BR-SBMS07	SbBR27	277	277	158	158	154	154	166	166	157	157	110	110	345	345	170	170	149	149	333	333	243	243	152	152	336	336	260	260	163	163	166	166	166	166	100	100	294	294	169	169	142	142	265	265	230	230	95	95
BR-SBMS18	SbBR28	277	277	158	158	154	154	166	166	157	157	108	110	345	345	170	170	147	147	333	333	243	243	152	152	334	334	260	260	163	163	166	166	166	166	100	100	294	294	169	169	143	143	265	265	230	230	89	89
BR-SBMS25	SbBR29	277	281	144	158	132	151	166	166	155	155	112	112	324	345	170	170	147	147	333	333	243	243	150	150	334	334	262	281	153	153	183	183	158	158	102	102	294	294	169	169	143	143	267	267	228	228	85	85
BR-SBMS26	SbBR30	277	277	158	158	154	154	166	166	157	157	110	110	345	345	170	170	149	149	333	333	243	243	152	152	336	336	260	260	163	163	166	166	166	166	100	100	294	294	169	169	142	142	265	265	230	230	81	95
BR-SBMS27	SbBR31	277	277	158	158	133	133	166	166	157	157	110	110	345	345	170	170	149	149	333	333	243	243	152	152	336	336	260	260	163	165	166	166	158	158	100	100	294	294	169	169	142	142	265	265	230	230	85	115
BR-SBNT01	SbBR32	279	279	156	156	152	152	152	166	153	153	104	104	345	345	150	186	147	147	333	333	243	243	148	148	336	336	262	262	153	153	185	185	164	164	94	94	294	294	169	169	141	141	267	267	228	228	85	85
BR-SBNT05	SbBR33	277	277	156	156	154	154	156	156	155	155	110	110	345	345	186	186	149	149	333	333	243	243	152	152	336	336	260	260	153	153	185	185	173	173	100	100	294	294	169	169	143	143	265	265	228	228	83	83
BR-SBNT10	SbBR34	277	277	158	158	154	154	166	166	157	157	108	108	324	324	170	170	147	147	333	333	243	243	152	152	334	334	260	260	153	153	166	166	160	160	90	90	288	288	169	169	143	143	267	267	230	230	89	89
BR-SBNT17	SbBR35	277	277	158	158	136	136	166	166	153	153	104	104	341	341	150	186	147	147	333	333	243	243	148	148	336	336	262	262	153	153	185	185	129	129	94	94	294	294	169	169	143	143	267	267	228	228	85	85
BR-SBNT18	SbBR36	277	277	158	158	133	133	0	0	151	151	88	88	345	345	170	170	147	147	345	345	243	243	152	152	336	336	260	260	153	153	185	185	158	158	100	100	288	288	169	169	143	143	267	267	228	228	85	85
BR-SBNT30	SbBR37	279	279	156	156	152	152	166	166	153	153	110	110	345	345	192	192	147	147	333	333	243	243	152	152	334	334	260	260	153	153	185	185	164	164	88	88	291	291	169	169	142	142	265	265	228	228	85	85
BR-SBTA01	SbBR38	279	279	156	156	154	154	166	166	147	147	104	104	345	345	178	178	147	147	333	333	243	243	152	152	334	334	260	260	155	155	185	185	160	160	100	100	294	294	169	169	143	143	265	265	228	228	95	115
BR-SBTA02	SbBR39	279	279	156	156	153	153	166	166	157	157	110	110	345	345	170	170	0	0	333	333	243	243	150	150	334	334	0	0	0	0	0	0	160	160	0	0	288	288	169	169	145	145	267	267	228	228	89	89
BR-SBTA03	SbBR40	277	277	158	158	155	155	166	166	157	157	110	110	345	345	160	160	147	147	333	333	243	243	152	152	334	334	260	260	153	153	185	185	173	173	100	100	294	294	169	169	144	144	267	267	230	230	95	95
BR-SBTA05	SbBR41	277	277	146	146	133	133	166	166	153	153	110	110	334	345	170	170	149	149	333	333	243	243	152	152	334	334	260	260	153	153	185	185	156	156	100	100	294	294	169	169	142	142	265	265	228	228	85	85
BR-SBTA06	SbBR42	277	277	156	156	155	155	166	166	147	147	104	104	345	345	178	178	147	147	333	333	243	243	152	152	334	334	260	260	153	153	185	185	160	173	100	100	294	294	169	169	144	144	265	265	230	230	93	115
BR-SBTA13	SbBR43	277	277	158	158	133	133	166	166	151	151	110	110	345	345	170	170	149	149	333	333	243	243	152	152	336	336	260	260	153	153	185	185	158	158	100	100	294	294	169	169	142	142	265	265	230	230	95	113
BR-SBTA16	SbBR44	277	277	158	158	133	133	166	166	151	151	110	110	345	345	170	170	149	149	333	333	243	243	152	152	336	336	260	260	153	153	185	185	158	158	100	100	294	294	169	169	142	142	265	265	230	230	95	95
BR-SBTA21	SbBR45	277	277	158	158	153	153	166	166	155	155	110	110	345	345	170	170	145	145	333	333	243	243	152	152	334	334	260	260	155	155	169	169	158	158	104	104	288	288	169	169	145	145	265	265	228	228	89	89
BR-SBTA22	SbBR46	277	277	140	140	154	154	166	166	151	151	104	104	345	345	178	178	147	147	345	345	243	243	152	152	336	336	260	260	153	153	185	185	129	129	100	100	294	294	169	169	143	143	267	267	228	228	93	113
BR-SBTG01	SbBR47	277	277	146	146	132	132	156	156	151	151	110	110	345	345	170	170	145	145	333	333	243	243	152	152	334	334	260	260	151	151	185	185	168	168	100	100	288	288	169	169	141	170	267	267	228	228	87	87
BR-SBTG03	SbBR48	277	277	164	164	154	154	164	164	143	143	104	104	324	324	170	170	145	145	333	333	243	243	152	152	335	335	274	274	153	153	185	185	154	154	100	100	288	288	169	169	143	143	267	267	228	228	89	89
BR-SBTG04	SbBR49	277	277	140	140	154	154	156	156	157	157	110	110	345	345	170	170	145	145	333	333	243	243	152	152	344	344	260	260	151	151	185	185	168	168	100	100	288	288	169	169	141	141	265	265	230	230	89	89
BR-SBTS01	SbBR50	277	277	140	140	155	155	149	149	157	157	110	110	324	324	192	192	145	145	333	333	243	243	152	152	351	351	262	262	151	151	185	185	129	129	90	90	294	294	169	169	144	144	267	267	228	228	91	113
BR-SBTS14	SbBR51	277	277	158	158	133	133	166	166	151	151	110	110	345	345	170	170	149	149	333	333	243	243	152	152	336	336	260	260	153	153	185	185	158	158	100	100	294	294	169	169	142	142	265	265	230	230	81	95
BR-SBTS15	SbBR52	277	277	158	158	133	133	166	166	151	151	110	110	345	345	170	170	149	149	333	333	243	243	152	152	336	336	260	260	153	153	185	185	158	158	100	100	294	294	169	169	142	142	265	265	230	230	95	95
BR-SBTS17	SbBR53	277	277	140	140	155	155	149	149	157	157	110	110	324	324	192	192	145	145	333	333	243	243	152	152	350	350	262	262	151	151	185	185	129	129	90	90	294	294	169	169	144	144	267	267	228	228	91	113
BR-SBTT09	SbBR54	277	277	156	156	155	155	166	166	155	155	110	110	325	325	170	170	147	147	333	333	243	243	152	152	334	334	260	260	153	153	185	185	162	162	90	90	288	288	169	169	143	143	267	267	230	230	89	89
BR-SBTW01	SbBR55	277	277	158	158	133	133	166	166	147	147	110	110	345	345	170	170	147	147	333	333	243	243	152	152	334	334	260	260	153	153	185	185	160	160	100	100	294	294	169	169	143	143	265	265	230	230	95	95
BR-SBTW02	SbBR56	277	277	158	158	133	133	166	166	151	151	110	110	345	345	170	170	147	147	333	333	243	243	152	152	336	336	260	260	153	153	185	185	156	156	100	100	294	294	169	169	143	143	265	265	230	230	95	95
BR-SBTW05	SbBR57	277	277	158	158	133	133	166	166	151	151	110	110	345	345	170	170	149	149	333	333	243	243	152	152	336	336	260	260	153	153	185	185	158	158	100	100	294	294	169	169	142	142	265	265	230	230	93	93
BR-SBTW06	SbBR58	277	277	158	158	154	154	156	156	153	153	104	104	324	334	178	178	147	147	333	333	243	243	152	152	336	336	260	260	155	155	185	185	129	129	100	100	288	288	169	169	143	143	265	265	230	230	87	87
BR-SBTW07	SbBR59	277	277	158	158	133	133	166	166	151	151	110	110	345	345	148	170	147	147	333	333	243	243	152	152	336	336	260	260	153	153	185	185	158	158	0	0	294	294	169	169	143	143	265	265	230	230	95	95
BR-SBTW11	SbBR60	279	279	156	156	154	154	166	166	151	151	110	110	345	345	170	170	147	147	333	333	243	243	152	152	334	334	260	260	153	153	185	185	160	160	100	100	294	294	169	169	143	143	265	265	228	230	95	95
BR-SBTW13	SbBR61	277	277	158	158	133	154	166	166	151	157	110	110	345	345	160	170	147	149	333	333	243	243	152	152	334	336	260	260	153	153	185	185	156	173	100	100	294	294	169	169	144	144	265	267	230	230	81	95
BRA-SBBG16	SbBRA01	279	279	156	156	154	154	166	166	157	157	110	110	345	345	170	170	151	151	333	333	243	243	152	152	334	334	260	260	153	153	166	166	160	160	100	100	288	288	169	169	144	144	267	267	228	228	89	113
BRA-SBBG31	SbBRA02	277	277	156	156	156	156	166	166	157	157	108	108	345	345	170	170	147	147	333	333	243	243	148	152	334	334	278	278	155	155	185	185	160	160	104	104	288	288	169	169	142	142	265	265	230	230	81	89
BRA-SBBG33	SbBRA03	279	279	156	156	154	154	166	166	157	157	110	110	341	345	170	170	151	151	333	333	243	243	152	152	334	334	260	260	153	153	166	166	160	160	100	100	288	288	169	169	144	144	267	291	228	228	89	89
BRA-SBBG47	SbBRA04	279	279	156	156	154	154	166	166	157	157	110	110	345	345	170	170	151	151	333	333	243	243	152	152	334	334	260	260	153	153	166	166	160	160	100	100	288	288	169	169	144	144	267	267	228	228	89	89
BRA-SBLB24	SbBRA05	279	279	156	156	156	156	166	166	141	141	112	112	345	345	188	188	147	147	333	333	243	243	152	152	334	334	278	278	151	151	166	166	127	127	100	100	288	288	169	169	144	144	267	267	230	230	83	115
BRA-SBNT07	SbBRA06	277	277	158	158	155	155	166	166	157	157	108	108	324	324	170	170	147	147	333	333	243	243	152	152	334	334	260	260	153	153	166	166	160	160	90	90	288	288	169	169	143	143	267	267	230	230	89	89
BRA-SBNT09	SbBRA07	279	279	158	158	154	154	166	166	153	153	108	108	345	345	170	170	151	151	333	333	243	243	152	152	334	334	260	260	153	153	166	166	160	160	94	94	288	288	169	169	143	143	267	267	230	230	89	89
BRA-SBNT20	SbBRA08	277	277	156	156	154	154	156	156	155	155	112	112	345	345	170	170	147	147	333	333	243	243	152	152	344	344	260	260	149	149	169	169	168	168	88	88	294	294	169	169	143	143	265	265	228	228	85	85
BRA-SBNT22	SbBRA09	277	277	156	156	152	152	156	156	157	157	110	110	345	345	170	170	147	147	333	333	243	243	152	152	334	350	260	260	153	153	185	185	129	129	90	90	288	288	169	169	143	143	267	267	228	228	89	89
BRA-SBTA25	SbBRA10	279	279	158	158	154	154	166	166	153	153	108	108	345	345	170	170	151	151	333	333	243	243	152	152	334	334	260	260	153	153	166	166	160	160	94	94	288	288	169	169	143	143	267	267	230	230	89	115
BRA-SBTG05	SbBRA11	277	277	158	158	131	131	149	149	147	147	116	118	328	328	158	158	151	151	333	333	235	235	148	148	348	348	268	268	132	132	181	181	136	136	100	100	288	288	169	169	0	0	271	271	228	228	93	93
BRA-SBTG06	SbBRA12	277	277	158	158	131	131	149	149	147	147	116	116	328	328	158	158	151	151	333	333	235	235	148	148	348	348	268	268	132	132	181	181	136	136	100	100	288	288	169	169	0	0	271	271	228	228	93	93
MR219_01	PMCV01	277	277	156	156	154	154	155	165	153	153	110	110	345	345	170	170	147	147	333	333	243	243	152	152	334	336	278	278	153	163	185	185	160	160	100	100	288	288	169	169	144	144	271	271	230	230	93	93
MR219_02	PMCV02	277	277	156	156	154	154	165	165	153	153	110	110	345	345	170	170	147	147	333	333	243	243	152	152	334	334	278	278	153	163	185	185	160	160	102	102	288	288	146	169	144	144	271	271	228	228	89	89
MR219_03	PMCV03	277	277	156	156	154	154	165	165	153	153	110	110	345	345	170	170	147	147	333	333	243	243	152	152	334	334	278	278	163	163	185	185	160	160	100	100	288	288	169	169	144	144	271	271	228	228	89	89
MR219_04	PMCV04	277	277	156	156	154	154	165	165	153	153	110	110	345	345	170	170	147	147	333	333	243	243	152	152	334	334	278	278	163	163	185	185	160	160	100	100	288	288	169	169	144	144	271	271	228	228	89	89
MR219_05	PMCV05	277	277	156	156	154	154	165	165	153	153	110	110	345	345	170	170	147	147	333	333	243	243	152	152	334	334	278	278	163	163	185	185	160	160	100	100	288	288	169	169	144	144	271	271	230	230	89	89
MR219_06	PMCV06	277	277	156	156	154	154	165	165	153	153	110	110	345	345	170	170	147	147	333	333	243	243	152	152	334	334	278	278	163	163	185	185	160	160	100	100	288	288	169	169	144	144	271	271	228	228	89	89
MR219_07	PMCV07	277	277	136	156	134	154	165	165	153	153	110	110	345	345	170	170	147	147	333	345	243	243	152	152	334	334	260	278	153	163	185	185	160	160	100	100	288	288	169	169	142	142	271	271	230	230	89	89
MR219_08	PMCV08	277	277	156	156	154	154	165	165	153	153	110	110	345	345	170	170	147	147	333	345	243	243	152	152	334	334	260	278	153	163	185	185	160	160	100	100	288	288	169	169	144	144	269	271	228	228	89	89
MR219_09	PMCV09	277	277	156	156	154	154	165	165	153	153	110	110	345	345	170	170	147	147	333	333	243	243	152	152	334	334	278	278	163	165	185	185	160	160	100	100	288	288	169	169	144	144	271	271	230	230	89	89
MR219_10	PMCV10	277	277	156	156	154	154	165	165	153	153	110	110	345	345	170	170	147	147	333	333	243	243	152	152	334	334	278	278	163	163	185	185	160	160	100	100	288	288	169	169	144	144	271	271	230	230	89	89
MR219_11	PMCV11	277	277	156	156	154	154	165	165	153	153	110	110	345	345	170	170	147	147	333	333	243	243	152	152	334	334	278	278	163	163	185	185	160	160	100	100	288	288	169	169	144	144	271	271	230	230	89	89
MR219_12	PMCV12	277	277	156	156	154	154	165	165	153	153	110	110	345	345	170	170	147	147	333	333	243	243	152	152	334	334	278	278	163	163	185	185	160	160	100	100	288	288	169	169	144	144	271	271	230	230	89	89
MR219_13	PMCV13	277	277	156	156	154	154	165	165	153	153	110	110	345	345	170	170	147	147	333	333	243	243	152	152	334	334	278	278	163	163	185	185	160	160	100	100	288	288	169	169	144	144	271	271	230	230	89	89
MR219_14	PMCV14	277	277	156	156	154	154	165	165	153	153	110	110	345	345	170	170	147	147	333	333	243	243	152	152	334	334	278	278	163	163	185	185	160	160	100	100	288	288	169	169	144	144	271	271	230	230	89	89
MR219_15	PMCV15	277	277	156	156	154	154	165	165	153	153	110	110	345	345	170	170	147	147	333	333	243	243	152	152	334	334	278	278	163	163	185	185	160	160	100	100	288	288	169	169	144	144	271	271	230	230	89	89
MR219_16	PMCV16	277	277	156	156	154	154	165	165	153	153	110	110	345	345	170	170	147	147	333	333	243	243	152	152	334	334	278	278	163	163	185	185	160	160	100	100	288	288	169	169	144	144	271	271	230	230	89	89
MR220_01	PMCV17	277	277	156	156	154	154	165	165	153	153	110	110	345	345	170	170	147	147	333	333	243	243	152	152	334	334	278	278	163	163	185	185	160	160	100	100	288	288	169	169	144	144	271	271	230	230	89	89
MR220_02	PMCV18	277	277	136	156	154	154	165	165	153	153	110	110	345	345	170	170	147	147	333	333	243	243	152	152	334	334	278	278	163	163	185	185	160	160	100	100	288	288	169	169	144	144	271	271	228	228	89	89
MR220_03	PMCV19	277	277	156	156	154	154	165	165	153	153	110	110	345	345	170	170	147	147	333	333	243	243	152	152	334	334	278	278	163	163	185	185	160	160	100	100	288	288	169	169	144	144	271	271	230	232	85	89
MR220_04	PMCV20	277	277	156	156	154	154	165	165	153	153	110	110	345	345	170	170	147	147	333	333	243	243	152	152	334	334	278	278	163	163	185	185	160	160	100	100	288	288	169	169	144	144	271	271	228	228	85	89
MR220_05	PMCV21	277	277	156	156	154	154	165	165	153	153	110	110	345	345	170	170	147	147	333	333	243	243	152	152	334	334	278	278	163	163	185	185	160	160	100	100	288	288	169	169	144	144	271	271	230	230	89	89
MR220_06	PMCV22	277	277	156	156	154	154	151	151	153	153	110	110	345	345	170	170	147	147	333	333	243	243	152	152	334	334	278	278	163	163	185	185	160	160	100	100	288	288	169	169	144	144	271	271	230	230	89	89
MR220_07	PMCV23	277	277	156	156	154	154	165	165	153	153	110	110	345	345	170	170	147	147	333	333	243	243	152	152	334	334	278	278	163	163	185	185	158	158	100	100	288	288	169	169	144	144	271	271	230	230	89	89
MR211	PMCV24	277	277	156	156	154	154	165	165	153	153	114	114	349	349	170	170	147	147	333	333	243	243	152	152	334	334	278	278	163	163	165	165	160	160	100	100	288	288	169	169	144	144	271	271	230	230	85	85
MR249	PMCV25	277	277	156	156	154	154	151	165	153	153	114	114	349	349	170	170	147	147	333	333	243	243	152	152	334	334	278	278	163	163	165	165	160	160	100	100	288	288	169	169	144	144	271	271	230	230	89	89
SH001-KDHK01	KDHK01	277	277	156	156	154	154	166	166	153	153	110	110	345	345	170	170	147	147	333	333	243	243	152	152	334	334	278	278	163	163	185	185	160	160	100	100	288	288	169	169	144	144	271	271	230	230	89	89
SH001-SPKB01	SPKB01	277	277	140	140	154	154	166	166	153	153	110	110	345	345	170	170	147	147	333	333	243	243	152	152	334	336	278	278	163	163	185	185	160	160	100	100	288	288	169	169	144	144	271	271	230	230	89	89
SH002-KDGC01	KDGC01	277	277	156	156	154	154	166	166	153	153	110	110	345	345	170	170	147	147	333	333	243	243	152	152	334	334	278	278	163	163	185	185	158	160	100	100	288	288	169	169	144	144	271	271	230	230	89	89
SH002-KDHK01	KDHK02	277	277	156	156	154	154	166	166	153	153	110	110	345	345	170	170	147	147	333	333	243	243	152	152	334	334	278	278	163	163	185	185	160	160	100	100	288	288	169	169	144	144	271	271	230	230	89	89
SH004-KNBJ01	KNBJ02	277	277	158	158	154	154	166	166	153	153	110	110	345	345	170	170	149	149	333	333	243	243	152	152	336	336	260	278	153	163	185	185	160	160	100	100	288	288	169	169	142	142	271	271	230	230	89	89
SH004-SLSB01	SLSB02	277	277	156	156	154	154	154	154	155	155	110	110	345	345	170	170	149	149	333	333	243	243	152	152	0	0	282	282	153	153	185	185	168	168	100	100	294	294	169	169	142	142	265	265	228	228	85	85
SH004-SLSK01	SLSK02	277	277	156	156	155	155	166	166	153	153	110	110	345	345	170	170	147	147	333	333	243	243	152	152	334	334	278	278	163	163	185	185	160	160	100	100	288	288	169	169	144	144	267	271	230	230	89	89
SH004-SPKB01	SPKB02	277	277	158	158	154	154	166	166	153	153	110	110	345	345	170	170	147	147	333	333	243	243	152	152	334	334	278	278	163	163	185	185	160	160	100	100	288	288	140	169	144	144	265	265	230	230	89	89
SH005-KDGC02	KDGC06	277	277	140	140	154	154	166	166	153	153	110	110	345	345	170	170	147	147	333	333	243	243	152	152	334	334	260	260	163	163	179	179	129	129	100	100	288	288	169	169	144	144	271	273	230	230	89	89
SH005-SPKB01	SPKB03	277	277	156	158	133	154	166	166	153	153	110	110	345	345	170	170	147	147	333	333	243	243	152	152	0	0	260	278	163	163	185	185	160	160	100	100	288	288	169	169	144	144	267	271	230	230	89	89
SH005-SPSD06	SPSD04	277	277	156	156	134	134	166	166	153	153	110	110	345	345	170	170	147	149	333	333	243	243	152	152	336	336	258	278	163	163	185	185	158	164	100	100	288	288	169	169	144	144	271	271	230	230	89	89
SH005-TRJH01	TRJH01	277	277	140	156	154	154	166	166	153	153	110	110	345	345	170	170	147	147	333	333	243	243	152	152	334	336	260	278	153	163	185	185	160	160	100	100	288	288	169	169	144	144	265	271	230	230	95	95
SH006-KNMA01	KNMA03	277	277	156	156	154	154	166	166	157	157	110	110	324	345	170	170	149	149	333	333	243	243	152	152	334	334	278	278	153	163	185	185	160	173	100	100	294	294	169	169	0	0	271	271	230	230	89	89
SH006-KNML01	KNML12	277	277	156	160	133	154	166	166	151	153	110	110	345	345	170	170	147	149	333	333	243	243	152	152	334	334	260	278	155	163	185	185	129	160	100	100	100	100	169	169	144	144	267	271	230	230	89	95
SH006-KNPB01	KNPB02	277	277	156	156	133	154	166	166	153	153	110	110	345	345	170	170	147	147	333	333	243	243	152	152	334	336	278	278	163	163	185	185	158	160	100	100	288	294	169	169	0	0	265	271	230	230	89	89
SH007-KDHK01	KDHK05	277	277	156	156	154	154	166	166	153	153	110	110	345	345	170	170	147	147	333	333	243	243	152	152	334	334	278	278	163	163	185	185	160	160	100	100	288	288	169	169	144	144	271	271	230	230	89	89
SH007-KDKM01	KDKM05	277	277	156	156	154	154	166	166	153	153	110	110	345	345	170	170	147	147	333	333	243	243	152	152	334	334	278	278	163	163	185	185	160	160	100	100	288	288	169	169	144	144	267	271	230	230	89	89
SH007-PLPB01	PLPB02	277	277	156	156	154	154	166	166	153	153	110	110	345	345	170	170	147	147	333	333	243	243	152	152	334	334	278	278	163	163	185	185	160	160	100	100	288	288	169	169	144	144	271	271	230	230	89	89
SH008-KDGC01	KDGC03	277	277	156	156	154	154	166	166	153	153	104	104	345	345	178	178	147	147	333	333	243	243	152	152	336	336	278	278	163	163	185	185	160	160	100	100	288	288	169	169	144	144	271	271	230	230	85	85
SH011-KDGC01	KDGC04	277	277	148	148	154	154	166	166	155	155	104	104	345	345	178	178	147	147	333	333	243	243	152	152	334	334	260	260	153	163	185	185	160	160	100	100	288	288	169	169	144	144	267	271	230	230	89	89
SH011-KDPD01	KDPD05	277	277	156	156	154	154	166	166	153	153	104	110	345	345	170	178	147	147	333	333	243	243	152	152	334	334	279	279	153	163	185	185	160	160	100	100	288	288	169	169	142	144	267	271	230	230	89	89
SH011-PLPB01	PLPB03	277	277	156	158	154	154	166	166	153	153	110	110	345	345	170	170	147	147	333	333	243	243	152	152	334	334	260	278	163	163	185	185	158	158	100	100	288	294	169	169	144	144	271	271	228	228	89	89
SH011-SPBM01	SPBM05	277	277	148	148	140	140	166	166	151	151	110	110	345	345	178	178	147	147	333	333	243	243	152	152	344	344	278	278	153	163	185	185	129	129	100	100	288	288	140	169	144	144	271	271	228	228	89	89
SH011-SPSD01	SPSD02	277	277	158	158	154	154	166	166	153	153	110	110	345	345	170	170	147	147	333	333	243	243	152	152	334	334	278	278	153	153	185	185	158	160	100	100	288	288	169	169	144	144	265	271	230	230	89	95
SH012-KDKM01	KDKM07	277	277	156	156	154	154	166	166	153	153	110	110	345	345	170	184	145	147	333	333	243	243	152	152	334	334	278	278	153	163	185	185	160	160	100	100	288	288	169	169	144	144	271	271	230	230	89	89
SH012-KDPD01	KDPD06	277	277	156	156	154	154	156	156	153	153	112	112	324	324	170	170	147	147	333	333	243	243	152	152	336	336	278	278	163	163	165	165	158	158	100	100	288	288	169	169	142	156	271	271	230	230	85	85
SH012-KDSL01	KDSL05	277	277	156	156	111	154	166	166	153	153	110	110	345	345	170	170	147	149	333	333	243	243	152	152	332	334	278	278	163	163	185	185	160	160	100	100	288	288	169	169	144	144	271	271	230	230	89	89
SH012-KNBJ01	KNBJ04	0	0	148	156	111	111	166	166	161	161	110	110	341	341	170	170	147	147	333	333	243	243	152	152	332	342	260	278	153	163	185	185	160	160	100	100	288	288	169	169	144	144	267	267	230	230	89	89
SH012-KNML01	KNML06	277	277	156	156	154	154	166	166	153	153	110	110	345	345	170	170	147	147	345	345	243	243	152	152	334	342	278	278	153	163	185	185	160	160	100	100	288	294	169	169	144	144	267	271	230	230	89	89
SH012-KNPB01	KNPB12	277	277	154	156	154	154	166	166	153	153	110	110	345	345	170	170	147	147	333	333	243	243	152	152	334	334	278	278	159	163	185	185	129	160	100	100	288	288	169	169	144	144	265	271	230	230	89	89
SH013-KDHK01	KDHK08	277	277	156	156	154	154	166	166	153	153	110	110	345	345	170	170	147	147	333	333	243	243	152	152	334	334	278	278	163	163	185	185	160	160	100	100	288	288	169	169	144	144	271	271	230	230	89	89
SH013-KDKM01	KDKM08	277	277	156	156	154	154	166	166	153	153	110	110	345	345	170	170	147	147	333	333	243	243	152	152	334	334	278	278	163	163	185	185	160	160	100	100	288	288	169	169	144	144	271	271	230	230	89	89
SH014-PLGH01	PLGH04	277	277	156	156	154	154	166	166	157	157	104	110	346	346	170	178	149	149	333	333	243	243	152	152	334	334	278	278	163	163	185	185	160	160	100	100	288	288	169	169	144	144	271	271	228	228	89	89
SH016-PLPB01	PLPB04	277	277	148	156	133	154	166	166	153	155	110	110	345	345	170	170	147	147	333	333	243	243	152	152	334	334	260	278	153	163	185	185	158	158	100	100	288	288	169	169	144	144	271	271	230	230	89	89
SH017-SLSB01	SLSB04	0	0	156	156	155	155	152	152	153	153	110	110	345	345	170	170	147	147	333	333	243	243	152	152	0	0	278	278	153	163	185	185	172	172	100	100	294	294	163	163	0	0	267	267	230	230	87	87
SH017-TRGB01	TRGB01	277	277	156	156	154	154	166	166	149	153	110	110	345	345	170	170	147	147	333	333	243	243	152	152	334	334	278	278	157	157	185	185	158	158	100	100	288	288	140	169	144	144	267	271	230	230	89	89
SHA002-KDGC01	KDGC09	277	277	140	156	155	155	166	166	141	153	110	110	345	345	170	170	147	149	333	344	243	243	152	152	334	342	260	278	149	163	185	185	160	172	100	100	288	288	169	169	144	144	267	271	230	230	89	89
SHA002-KNML01	KNML01	277	277	156	156	154	154	166	166	153	153	110	110	345	345	170	170	147	147	333	333	243	243	152	152	336	336	260	278	153	153	185	185	158	160	100	100	288	294	169	169	144	144	271	271	230	230	95	95
SHA004-KDKM01	KDKM13	279	279	158	158	133	154	166	166	155	155	110	110	345	345	170	170	147	147	333	333	243	243	152	152	334	334	278	278	163	163	185	185	160	160	100	100	294	294	169	169	142	142	271	271	230	230	89	89
SHA006-PLPB01	PLPB07	279	279	158	158	154	154	166	166	153	153	110	110	345	345	170	170	147	147	333	333	243	243	152	152	334	334	260	260	139	139	169	169	160	160	100	100	288	288	169	169	144	144	271	271	230	230	85	85
SHA008-PLPB02	PLPB13	277	277	156	156	111	154	166	166	153	157	110	110	345	345	170	170	147	147	333	333	243	243	152	152	0	0	278	278	163	163	169	169	160	160	94	94	294	294	169	169	144	144	265	271	228	230	89	89
SHA010-KDKM01	KDKM15	277	277	156	156	154	154	166	166	157	157	110	110	345	345	170	170	147	147	333	333	243	243	152	152	334	334	278	278	153	153	185	185	160	160	100	100	288	288	169	169	144	144	265	271	230	230	89	89
SHA011-SPSD01	SPSD08	277	277	156	156	154	154	166	166	157	157	110	110	345	345	170	170	147	149	333	333	243	243	152	152	334	334	278	278	153	153	185	185	160	160	100	100	294	294	169	169	144	144	271	271	230	230	89	89
SHA013-SPSD01	SPSD09	277	277	156	156	154	154	166	166	155	155	112	112	324	324	192	192	147	147	333	333	243	243	152	152	336	336	278	278	163	163	185	185	160	160	100	100	288	288	169	169	142	142	271	271	230	230	85	89
SHA014-PLPB01	PLPB08	279	279	158	158	155	155	166	166	153	153	110	110	345	345	170	170	147	147	333	333	243	243	152	152	0	0	260	260	139	139	169	169	160	160	100	100	288	288	169	169	144	144	271	271	230	230	89	89
SHA015-KDKM01	KDKM16	277	277	156	156	154	154	166	166	153	153	110	110	345	345	170	170	147	147	333	333	243	243	152	152	350	350	278	278	163	163	185	185	160	160	100	100	294	294	169	169	144	144	271	271	230	230	89	89
SHA017-PLPB01	PLPB09	279	279	158	158	155	155	166	166	153	153	110	110	345	345	170	170	147	147	333	333	243	243	152	152	334	334	260	260	139	139	169	169	160	160	100	100	288	288	169	169	144	144	271	271	230	230	89	89
SHA018-PLPB01	PLPB10	279	279	158	158	155	155	166	166	153	153	110	110	324	324	170	170	147	147	333	333	243	243	152	152	0	0	260	278	139	139	169	169	160	160	100	100	288	288	169	169	144	144	271	271	230	230	89	89
SHA019-KDPD01	KDPD17	277	277	156	156	120	120	166	166	151	151	110	110	345	345	170	170	147	149	333	333	243	243	152	152	334	334	278	278	153	153	185	185	160	160	100	100	288	294	169	169	144	144	271	271	228	228	0	0
SHA019-PLGH01	PLGH07	277	277	156	156	154	154	166	166	151	151	112	112	345	345	192	192	147	147	333	333	243	243	152	152	342	342	278	278	163	163	185	185	160	160	100	100	294	294	169	169	144	144	271	271	228	228	85	85
SHA021-KNML01	KNML14	277	277	156	156	154	154	166	166	153	153	110	110	345	345	170	170	147	147	333	333	243	243	152	152	334	334	278	278	163	163	167	167	160	160	100	100	100	100	154	168	144	144	271	271	230	230	89	89
SHA007-KDPD01	KDPD20	277	277	140	156	133	154	166	166	151	153	110	110	345	345	170	170	147	149	333	333	243	243	152	152	334	336	260	278	153	163	185	185	160	160	100	100	288	294	169	169	144	144	265	271	230	230	89	95
SHA020-KNML01	KNML16	279	279	154	154	154	154	166	166	141	141	108	108	349	349	170	170	151	151	333	333	243	243	152	152	334	334	278	278	159	159	187	187	160	160	88	88	288	288	166	166	144	144	265	265	228	228	81	93
mSH002-KDPD01	KDPD01	277	277	140	140	133	154	166	166	151	151	110	110	345	345	170	170	147	147	333	333	243	243	152	152	334	336	260	260	163	163	185	185	160	174	100	100	294	294	169	169	144	144	267	271	230	230	89	89
mSH003-KDPD01	KDPD02	277	277	156	156	154	154	166	166	153	153	112	112	345	345	186	186	147	147	333	333	243	243	148	148	342	342	260	260	153	153	183	183	160	160	94	94	294	294	169	169	142	142	263	263	230	230	85	85
mSH003-SLSK01	SLSK01	277	277	140	140	155	155	156	156	151	151	110	110	345	345	184	184	149	149	333	333	243	243	152	152	336	336	260	260	153	153	185	185	169	169	100	100	288	288	140	169	144	144	267	269	230	230	89	89
mSH003-SPBM01	SPBM01	277	277	140	140	155	155	156	156	151	151	110	110	345	345	184	184	149	149	333	333	243	243	152	152	336	336	260	260	153	153	185	185	152	152	100	100	288	288	140	140	142	156	267	267	230	230	87	87
mSH004-KNMA01	KNMA01	279	279	156	156	133	133	166	166	151	151	110	110	345	345	170	170	149	149	333	333	243	243	152	152	334	334	260	278	153	163	179	179	160	160	100	100	288	288	169	169	142	142	267	267	230	230	89	95
mSH004-PLGH01	PLGH01	277	277	158	158	154	154	156	156	151	151	110	110	345	345	178	178	149	149	333	333	243	243	152	152	336	336	260	260	151	151	185	185	168	168	100	100	294	294	169	169	156	156	269	269	228	228	89	89
mSH004-SLSK02	SLSK05	277	277	156	156	133	133	166	166	153	153	110	110	345	345	170	170	149	149	333	333	243	243	152	152	334	334	260	260	163	163	185	185	160	163	100	100	294	294	140	169	142	142	271	271	230	230	95	99
mSH004-SPBM01	SPBM02	277	277	140	140	155	155	166	166	151	151	110	110	345	345	170	170	149	149	333	333	243	243	152	152	350	350	260	260	153	153	185	185	160	160	100	100	288	288	169	169	142	142	267	267	228	228	89	89
mSH005-KDGC01	KDGC02	281	281	140	156	154	154	166	166	153	153	110	110	345	345	170	172	147	147	333	333	243	243	152	152	334	334	260	278	153	153	185	185	160	160	100	100	294	294	169	169	142	142	267	271	230	230	89	89
mSH005-KDSL01	KDSL03	277	277	158	160	133	154	166	166	153	153	110	110	345	345	170	170	147	149	333	333	243	243	152	152	334	336	260	260	153	163	185	185	158	158	100	100	294	294	169	169	142	144	271	271	230	230	89	89
mSH005-KNBJ01	KNBJ03	277	277	158	160	133	154	166	166	153	153	110	110	345	345	170	170	149	149	333	333	243	243	152	152	334	334	260	280	153	163	185	185	160	160	100	100	294	294	169	169	144	144	265	271	230	230	89	95
mSH005-SLSK01	SLSK03	277	277	146	146	133	133	164	164	153	157	112	112	345	345	192	192	147	147	333	333	243	243	152	152	334	334	260	260	153	153	185	185	158	158	94	100	294	294	169	169	144	144	269	269	228	228	89	89
mSH006-KDKM01	KDKM04	277	277	158	158	154	154	166	166	153	153	110	110	345	345	170	170	149	149	333	333	243	243	152	152	336	336	260	260	153	163	185	185	160	160	100	100	288	288	169	169	142	142	265	265	230	230	0	0
mSH006-KDSL01	KDSL14	277	277	0	0	0	0	166	166	0	0	110	110	345	345	170	170	149	149	345	345	243	243	152	152	334	336	260	290	153	153	185	185	0	0	100	100	288	288	0	0	0	0	267	267	228	228	89	89
mSH006-PLGH01	PLGH03	279	279	156	156	155	155	166	166	147	147	104	104	345	345	178	178	147	147	333	333	243	243	152	152	334	334	260	260	153	153	185	185	160	160	100	100	288	288	169	169	142	142	265	265	228	228	89	89
mSH007-SPSD01	SPSD06	277	277	140	156	154	154	166	166	155	155	106	106	345	345	170	170	147	147	333	333	243	243	152	152	334	334	278	278	153	153	185	185	160	160	100	100	294	294	169	169	144	144	271	271	230	230	89	89
mSH008-KNML01	KNML03	277	277	148	156	111	133	166	166	153	153	110	110	345	345	170	170	145	147	333	333	243	243	152	152	350	350	260	260	153	163	185	185	160	168	100	100	288	288	169	169	142	144	267	271	230	230	89	89
mSH008-KNML04	KNML08	277	277	140	158	133	154	166	166	153	153	110	110	345	345	170	170	147	149	333	333	243	243	152	152	334	336	260	278	153	163	185	185	158	160	100	100	0	0	169	169	142	144	265	271	230	230	87	87
mSH009-KDKM01	KDKM06	277	277	136	156	132	154	166	166	153	153	110	110	345	345	160	170	147	147	333	333	243	243	152	152	336	336	260	278	153	153	185	185	158	158	100	100	288	288	169	169	142	144	267	271	230	230	89	95
mSH009-KNML01	KNML04	0	0	156	156	109	154	166	168	143	145	108	108	349	349	170	170	151	151	333	333	243	243	152	152	332	332	278	278	159	159	167	167	160	160	88	88	288	288	169	169	144	144	265	265	228	228	93	93
mSH010-SLSK01	SLSK04	277	277	140	140	133	133	166	166	153	153	104	104	324	324	178	178	145	145	333	333	243	243	152	152	336	336	260	260	155	155	185	185	160	160	100	100	294	294	140	169	142	142	267	267	228	228	89	89
mSH012-SPKB01	SPKB04	277	277	156	158	133	154	166	166	153	153	110	110	345	345	170	170	147	149	333	333	243	243	152	152	334	334	278	278	153	163	185	185	158	158	100	100	288	294	169	169	144	144	265	271	230	230	89	89
mSH012-SPSD01	SPSD03	277	277	156	156	154	154	166	166	153	153	110	110	345	345	170	170	147	149	333	333	243	243	152	152	334	334	278	278	163	163	185	185	160	160	100	100	288	288	140	169	144	144	265	271	230	230	89	89
mSH012-TRGB01	TRGB02	277	277	156	156	133	133	166	166	153	153	110	110	345	345	170	170	147	147	333	333	243	243	152	152	336	336	260	260	153	153	185	185	158	158	100	100	294	294	169	169	142	142	265	265	230	230	89	89
mSH014-PLGH02	PLGH08	277	277	146	146	133	133	166	166	0	0	110	110	345	345	170	170	147	147	333	333	243	243	152	152	336	336	260	260	153	153	185	185	157	157	100	100	294	294	169	169	142	142	267	267	228	228	89	89
mSH015-KDPD01	KDPD07	277	277	140	140	133	154	156	156	153	153	104	104	345	345	170	170	147	149	333	333	243	243	152	152	334	334	260	260	151	151	185	185	160	160	100	100	288	288	169	169	144	144	267	267	228	228	89	89
mSH016-KDPD01	KDPD08	277	277	156	156	133	133	166	166	155	155	110	110	345	345	170	170	147	149	333	333	243	243	152	152	334	334	278	278	153	153	185	185	164	164	100	100	288	288	140	169	144	144	267	269	228	228	95	95
mSHA001-SPBM01	SPBM12	277	277	140	140	143	143	166	166	155	155	110	110	345	345	170	170	149	149	345	345	243	243	152	152	342	342	260	260	153	153	179	179	160	160	100	100	288	288	169	169	142	142	269	269	228	228	95	95
mSHA004-SLSB01	SLSB08	277	277	140	140	133	154	166	166	153	155	110	110	345	345	170	170	147	147	333	333	243	243	152	152	342	342	260	260	153	153	151	179	160	160	100	100	288	288	169	169	0	0	271	271	228	228	89	89
mSHA005-KDPD01	KDPD15	277	277	146	146	132	132	166	166	151	151	104	104	345	345	178	178	147	147	333	333	243	243	152	152	334	334	260	260	0	0	185	185	160	160	100	100	294	294	169	169	142	142	267	267	230	230	89	89
mSHA007-KDHK01	KDHK13	277	277	158	158	154	154	166	166	151	151	110	110	345	345	170	170	147	147	333	333	243	243	152	152	336	336	260	260	163	163	185	185	160	160	100	100	294	294	169	169	144	144	271	271	230	230	89	89
mSHA007-KDKM01	KDKM14	277	277	140	140	133	154	166	166	153	153	110	110	345	345	170	170	149	149	333	333	243	243	152	152	334	334	260	260	163	163	185	185	160	160	100	100	288	288	169	169	142	142	271	271	228	228	95	95
mSHA007-KDPD02	KDPD18	277	277	156	156	120	120	166	166	151	151	110	110	345	345	170	170	149	149	333	333	243	243	152	152	334	334	278	278	153	153	185	185	164	164	100	100	288	288	140	169	144	144	271	271	228	228	95	95
mSHA007-KNML01	KDGC12	277	277	146	146	132	132	166	166	141	157	110	110	345	345	170	170	147	147	333	333	243	243	152	152	334	334	260	260	153	153	185	185	173	173	100	100	288	288	169	169	142	142	265	265	227	229	85	85
mSHA007-SPSD01	SPSD07	277	277	146	156	134	154	166	166	151	153	110	110	345	345	170	170	147	149	333	333	243	243	152	152	0	0	278	278	153	163	185	185	158	160	100	100	288	294	169	169	144	144	265	271	230	230	89	95
mSHA008-SPKB01	SPKB07	277	277	156	156	133	133	166	166	151	151	110	110	345	345	170	170	149	149	333	333	243	243	152	152	334	334	278	278	153	153	185	185	160	160	94	94	294	294	169	169	144	144	265	265	230	230	95	95
mSHA009-KDPK01	KDPD16	277	277	148	148	134	134	166	166	155	155	112	112	345	345	186	186	145	145	333	333	243	243	152	152	334	334	260	260	153	153	185	185	172	172	100	100	288	288	140	169	142	142	267	267	228	228	89	89
mSHA011-KNMA01	KNMA04	277	277	140	140	111	154	166	166	153	153	110	110	345	345	170	170	147	147	333	333	243	243	152	152	342	342	260	260	153	163	185	185	158	158	100	100	288	294	169	169	0	0	271	271	230	230	89	95
mSHA011-KNML01	KNML05	277	277	140	140	154	154	166	166	151	151	110	110	341	341	170	170	149	149	333	333	243	243	152	152	0	0	278	278	157	157	189	189	172	172	100	100	294	294	169	169	0	0	265	265	228	228	95	95
mSHA012-SPBM01	SPBM06	277	277	158	158	133	133	166	166	151	157	110	110	345	345	170	170	151	151	333	333	243	243	152	152	334	334	260	260	157	157	185	185	158	158	100	100	294	294	169	169	142	142	269	269	228	228	89	89
mSHA018-KDSL01	KDSL09	277	277	148	148	133	133	166	166	155	155	104	104	345	345	178	178	149	149	333	333	243	243	152	152	342	342	260	260	153	153	185	185	158	158	100	100	294	294	169	169	142	142	269	269	228	228	85	85
mSHA020-KNPB01	KNPB09	277	277	156	156	154	154	166	166	155	155	110	110	345	345	170	184	147	147	333	333	243	243	148	148	334	334	260	260	153	153	185	185	158	158	100	100	288	288	169	169	142	142	267	267	228	228	89	89
BR001-KDHK01	KDHK14	277	277	140	140	133	133	166	166	151	151	110	110	345	345	170	170	149	149	333	333	243	243	152	152	336	336	260	260	153	153	185	185	160	160	100	100	294	294	169	169	142	142	265	265	230	230	95	95
BR001-KDKM01	KDKM09	277	277	148	148	133	133	166	166	157	157	110	110	345	345	170	170	149	149	333	333	243	243	152	152	334	334	260	260	153	153	185	185	172	172	100	100	288	288	169	169	142	144	265	265	228	228	95	95
BR002-KDHK01	KDHK10	277	277	158	158	133	133	166	166	151	151	110	110	345	345	178	178	149	149	333	333	243	243	152	152	334	334	260	260	153	153	185	185	158	158	100	100	294	294	169	169	142	142	265	265	228	228	89	89
BR002-KDKM01	KDKM10	277	277	158	158	133	133	166	166	153	153	110	110	345	345	170	170	145	145	333	333	243	243	152	152	336	336	260	260	153	153	185	185	158	158	100	100	294	294	169	169	144	144	267	267	230	230	95	95
BR002-KDPD01	KDPD09	277	277	156	156	133	133	166	166	151	151	112	112	345	345	170	170	149	149	333	333	243	243	152	152	336	336	260	260	155	155	185	185	156	156	100	100	294	294	169	169	144	144	263	263	238	238	95	95
BR002-KDSL01	KDSL10	277	277	148	148	133	133	166	166	151	151	110	110	345	345	170	170	149	149	333	333	243	243	152	152	336	336	260	260	153	153	185	185	158	158	100	100	294	294	169	169	142	142	267	267	230	230	95	95
BR002-KNML01	KNML09	0	0	156	156	133	133	154	156	151	151	110	110	341	341	170	170	145	145	333	333	0	0	152	152	0	0	260	260	153	153	185	185	160	160	100	100	288	288	169	169	156	156	267	267	228	228	89	89
BR002-KNPB01	KNPB04	277	277	146	146	111	111	166	166	153	153	110	110	345	345	170	170	149	149	333	333	243	243	152	152	0	0	260	260	153	153	185	185	158	158	100	100	294	294	169	169	0	0	265	265	230	230	95	95
BR002-PLPB01	PLPB11	277	277	158	158	133	133	166	166	153	153	110	110	345	345	170	170	149	149	333	333	243	243	152	152	336	336	260	260	153	153	185	185	158	158	100	100	294	294	169	169	142	142	265	265	230	230	89	89
BR002-SLSB01	SLSB05	277	277	158	158	133	133	152	152	153	153	110	110	345	345	170	170	149	149	333	333	243	243	152	152	336	336	260	260	153	153	185	185	158	158	100	100	294	294	169	169	0	0	265	265	230	230	89	89
BR002-SPKB01	SPKB05	277	277	158	158	110	133	166	166	153	153	110	110	345	345	170	170	149	149	333	333	243	243	152	152	0	0	260	260	153	153	185	185	158	158	100	100	294	294	169	169	120	128	265	265	230	230	95	95
BR003-KDGC02	KDGC16	277	277	158	158	133	133	166	166	0	0	110	110	345	345	170	170	147	149	333	333	243	243	152	152	336	336	260	260	153	153	185	185	155	159	100	100	294	294	169	169	142	142	267	267	230	230	89	89
BR003-KDGC03	KDGC10	279	279	140	140	133	133	166	166	141	141	110	110	345	345	170	170	149	149	333	333	243	243	152	152	342	342	260	260	153	153	185	185	172	172	100	100	294	294	169	169	142	142	267	269	228	228	95	95
BR003-KDHK01	KDHK11	277	277	148	148	133	133	166	166	151	151	110	110	346	346	170	170	147	147	333	333	243	243	152	152	336	336	260	260	153	153	185	185	160	160	100	100	294	294	169	169	142	142	265	265	230	230	95	95
BR003-KDKM01	KDKM11	277	277	158	158	133	133	166	166	151	151	110	110	345	345	170	170	149	149	333	333	243	243	152	152	335	335	260	260	153	153	185	185	160	160	100	100	294	294	169	169	142	142	265	265	230	230	95	95
BR003-KDKM04	KDKM02	277	277	140	140	133	133	166	166	151	151	110	110	345	345	170	170	149	149	333	333	243	243	152	152	336	336	260	260	153	153	185	185	158	158	100	100	294	294	169	169	142	142	265	265	230	230	95	95
BR003-KDPD01	KDPD10	277	277	158	158	133	133	166	166	153	153	110	110	345	345	170	170	149	149	333	333	243	243	152	152	336	336	260	260	153	153	185	185	158	158	100	100	294	294	169	169	142	142	265	265	230	230	89	89
BR003-KDSL01	KDSL11	277	277	148	148	111	133	166	166	151	151	110	110	345	345	170	170	149	149	333	333	243	243	152	152	334	334	260	260	153	153	185	185	158	158	100	100	294	294	169	169	151	151	267	267	230	230	95	95
BR003-KDSL02	KDSL02	277	277	156	158	133	133	166	166	151	151	110	110	345	345	170	170	149	149	345	345	243	243	152	152	334	334	260	260	153	153	185	185	158	173	100	100	294	294	169	169	144	144	265	265	228	228	95	95
BR003-KNBJ01	KNBJ05	277	277	160	160	133	133	166	166	151	151	110	110	345	345	170	170	149	149	333	333	243	243	152	152	334	336	260	260	163	163	185	185	160	163	100	100	294	294	169	169	142	142	265	265	230	230	95	95
BR003-KNMA01	KNMA05	281	281	158	158	109	132	166	166	157	157	110	110	316	316	170	170	149	149	333	333	243	243	152	152	334	334	260	260	153	153	185	185	158	158	100	100	294	294	169	169	142	142	267	267	228	228	89	89
BR003-KNML01	KNML10	277	277	158	158	111	111	166	166	151	151	110	110	345	345	170	170	149	149	333	333	243	243	152	152	334	334	260	260	153	153	185	185	158	158	100	100	294	294	169	176	0	0	265	265	230	230	95	95
BR003-KNPB01	KNPB05	277	277	140	140	133	133	166	166	153	153	110	110	345	345	170	170	149	149	333	333	243	243	152	152	336	336	260	260	153	153	161	161	158	158	100	100	294	294	169	169	0	0	265	265	230	230	95	95
BR003-PLGH01	PLGH05	277	277	158	158	133	133	166	166	153	153	110	110	345	345	170	170	149	149	333	333	243	243	152	152	336	336	260	260	153	153	185	185	158	158	100	100	294	294	169	169	142	142	265	265	230	230	93	93
BR003-PLPB02	PLPB12	277	277	158	158	133	133	166	166	153	153	110	110	345	345	170	170	149	149	333	333	243	243	152	152	336	336	260	260	153	153	185	185	158	158	100	100	294	294	169	169	142	142	265	265	230	230	89	89
BR003-SLSB01	SLSB06	277	277	148	148	143	143	152	152	153	153	102	102	345	345	178	178	149	149	333	333	243	243	152	152	336	336	260	260	153	153	185	185	156	156	100	100	294	294	169	169	0	0	265	265	230	230	89	89
BR003-SPBM01	SPBM08	277	277	158	158	133	133	166	166	151	151	110	110	345	345	170	170	149	149	333	333	243	243	152	152	336	336	260	260	153	153	185	185	158	158	100	100	294	294	140	169	142	142	265	265	230	230	95	95
BR003-SPKB01	SPKB06	277	277	158	158	133	133	166	166	153	153	110	110	345	345	170	170	149	149	333	333	243	243	152	152	336	336	260	260	153	153	185	185	158	158	100	100	294	294	169	169	142	142	265	265	230	230	89	89
BR003-TRJH01	TRJH04	277	277	158	158	133	133	166	166	151	151	110	110	345	345	170	170	149	149	333	333	243	243	152	152	336	336	260	260	153	153	185	185	156	156	100	100	294	294	169	169	142	142	265	265	230	230	95	95
BR004-SPSD01	SPSD05	277	277	146	146	134	134	166	166	153	153	110	110	345	345	170	170	149	149	333	333	243	243	152	152	336	336	260	260	153	163	185	185	156	156	100	100	288	288	169	169	142	142	265	265	228	228	95	95
BR005-KDHK01	KDHK12	277	277	158	158	108	133	166	166	153	153	110	110	345	345	170	170	147	147	333	333	243	243	152	152	336	336	260	260	153	153	185	185	156	160	100	100	294	294	169	169	144	144	267	267	228	228	89	89
BR005-KDHK02	KDHK03	277	277	136	136	133	133	166	166	157	157	110	110	345	345	170	170	149	149	333	333	243	243	152	152	334	334	260	260	153	153	185	185	158	158	100	100	294	294	169	169	142	142	267	267	230	230	95	95
BR005-KDKM02	KDKM03	277	277	146	146	133	133	166	166	151	151	110	110	345	345	170	170	147	147	333	333	243	243	152	152	336	336	260	260	153	153	185	185	158	158	100	100	294	294	169	169	142	142	265	265	228	228	95	95
BR005-KDPD01	KDPD03	277	277	158	158	133	133	166	166	157	157	110	110	345	345	178	178	149	149	333	333	243	243	152	152	334	334	260	260	153	153	185	185	158	158	100	100	294	294	169	169	142	142	267	267	228	228	95	95
BR005-KNML01	KNML02	277	277	158	158	133	133	166	166	157	157	112	112	345	345	170	170	147	147	333	333	243	243	152	152	334	334	260	260	153	153	185	185	158	158	100	100	294	294	169	169	142	142	267	267	228	228	79	85
BR005-KNPB01	KNPB01	277	277	148	150	133	154	156	166	157	157	110	110	334	334	170	170	145	145	333	333	247	247	152	152	334	334	260	260	153	153	185	185	168	168	100	100	288	288	169	169	142	142	265	265	228	228	89	89
BR005-PLGH01	PLGH02	277	277	158	158	154	154	166	166	153	153	110	110	345	345	170	170	145	145	333	333	243	243	152	152	336	336	260	260	153	153	193	193	158	158	100	100	294	294	169	169	144	144	265	265	230	230	89	89
BR005-PLPB01	PLPB01	277	277	140	140	133	133	166	166	157	157	110	110	345	345	170	170	149	149	333	333	243	243	152	152	342	342	260	260	153	153	185	185	172	172	100	100	288	288	169	169	142	142	265	265	238	238	95	95
BR005-SLSB01	SLSB03	281	281	148	148	155	155	150	166	151	151	110	110	345	345	170	170	147	147	333	333	243	243	152	152	336	336	260	260	153	153	185	185	160	160	100	100	288	288	169	169	0	0	267	267	228	228	85	85
BR005-SPBM01	SPBM03	277	277	158	158	133	154	166	166	153	153	110	110	345	345	170	170	147	147	333	333	243	243	152	152	336	336	260	260	153	153	185	185	158	158	100	100	288	288	140	169	144	144	265	265	230	230	89	89
BR005-SPSD01	SPSD01	277	277	156	156	155	155	166	166	151	151	110	110	345	345	170	170	147	147	333	333	243	243	152	152	334	334	260	260	153	153	185	185	153	153	100	100	294	294	169	169	142	142	267	269	230	230	95	95
BR005-TRGN01	TRGN01	277	277	148	148	133	133	166	166	153	153	110	110	345	345	170	170	147	147	333	333	243	243	152	152	334	334	260	260	153	153	185	185	160	160	100	100	288	288	140	169	142	142	267	267	228	228	85	85
BR006-KDHK01	KDHK04	277	277	160	160	133	133	166	166	153	153	110	110	345	345	170	170	149	149	333	333	243	243	152	152	336	336	260	260	153	153	185	185	158	158	100	100	294	294	169	169	142	142	279	279	230	230	89	89
BR006-KDPD01	KDPD11	277	277	146	148	133	133	166	166	151	151	110	110	345	345	170	170	149	149	333	333	243	243	152	152	336	336	260	260	153	153	185	185	160	160	100	100	294	294	169	169	142	142	267	267	230	230	73	73
BR006-KDSL02	KDSL04	277	277	158	158	133	133	166	166	157	157	110	110	345	345	170	170	147	149	333	333	243	243	152	152	334	334	260	260	153	153	185	185	158	158	100	100	288	288	169	169	144	144	267	267	228	228	89	89
BR006-KNML01	KNML11	0	0	158	158	133	133	148	148	149	149	110	110	341	341	170	170	149	149	333	333	243	243	152	152	0	0	260	260	155	155	185	185	129	129	100	100	294	294	169	169	0	0	267	267	228	228	95	95
BR006-PLPB01	PLPB16	277	277	156	156	133	133	166	166	0	0	106	110	345	345	170	170	147	147	333	333	243	243	152	152	334	334	260	260	165	165	185	185	159	159	96	96	288	288	169	169	142	142	267	267	230	230	89	89
BR006-SPBM01	SPBM09	277	277	158	158	155	155	166	166	153	153	110	110	345	345	170	170	149	149	339	339	243	243	152	152	336	336	260	260	153	153	185	185	153	153	100	100	294	294	140	140	142	142	267	267	230	230	85	85
BR006-SPBM03	SPBM04	277	277	158	158	143	143	166	166	151	151	110	110	345	345	170	170	149	149	333	333	243	243	152	152	336	336	260	260	153	153	185	185	160	160	100	100	294	294	169	169	144	144	267	267	228	228	95	95
BR006-TRGN02	TRGN02	281	281	148	148	133	133	166	166	157	157	110	110	345	345	170	170	147	147	333	333	243	243	152	152	334	334	260	260	153	153	185	185	160	160	100	100	288	288	169	169	142	142	269	269	228	228	85	85
BR006-TRJH01	TRJH02	277	277	136	136	132	132	166	166	151	151	110	110	345	345	170	170	147	147	0	0	243	243	152	152	0	0	260	260	157	157	185	185	160	160	100	100	288	288	169	169	150	150	267	267	232	232	95	95
BR007-KDGC01	KDGC07	277	277	158	158	133	133	166	166	153	153	110	110	345	345	170	170	147	147	333	333	243	243	152	152	336	336	260	260	153	153	185	185	152	152	100	100	294	294	169	169	144	144	267	267	228	228	89	89
BR007-KDKM01	KDKM12	277	277	158	158	154	154	166	166	151	151	110	110	345	345	170	170	147	147	333	333	243	243	152	152	334	334	260	260	153	153	185	185	158	158	100	100	294	294	169	169	142	142	269	269	228	228	91	91
BR007-KDPD01	KDPD12	277	277	146	146	144	144	166	166	153	153	104	104	345	345	178	178	147	147	333	333	243	243	152	152	336	336	260	260	153	153	185	185	160	160	100	100	294	294	169	169	142	142	267	267	228	228	95	95
BR007-KNPB01	KNPB06	277	277	136	136	133	133	146	146	147	147	110	110	341	341	170	170	149	149	0	0	243	243	152	152	334	334	260	260	153	153	153	153	158	158	100	100	294	294	169	169	0	0	269	269	228	228	89	89
BR007-SLSB01	SLSB07	277	277	158	158	133	133	152	166	153	153	102	102	345	345	178	178	147	151	333	333	243	243	152	152	334	336	260	260	153	153	185	185	158	158	100	100	294	294	169	169	0	0	267	267	230	230	89	89
BR007-SPBM01	SPBM10	277	277	140	140	111	133	166	166	153	153	110	110	345	345	170	170	151	151	333	333	243	243	152	152	336	336	260	260	153	153	185	185	158	158	100	100	294	294	169	169	142	142	265	265	230	230	89	89
BR007-TRGN01	TRGN03	277	277	158	158	133	133	166	166	151	151	110	110	345	345	170	170	149	149	333	333	243	243	152	152	336	336	260	260	153	153	185	185	158	158	100	100	294	294	169	169	142	142	265	265	230	230	95	95
BR008-KDHK01	KDHK06	277	277	140	140	133	133	166	166	153	153	110	110	345	345	170	170	149	149	333	333	243	243	152	152	334	334	260	260	153	153	185	185	158	158	100	100	288	294	169	169	144	144	271	271	230	230	95	95
BR008-KDPD01	KDPD13	277	277	158	158	133	133	166	166	157	157	110	110	345	345	170	170	148	148	333	333	243	243	152	152	334	334	260	260	153	153	185	185	160	160	100	100	294	294	169	169	144	144	265	265	228	228	85	85
BR009-KDHK01	KDHK07	277	277	146	146	133	133	166	166	151	151	110	110	345	345	170	170	147	147	333	333	243	243	152	152	336	336	260	260	153	153	185	185	158	158	100	100	294	294	169	169	142	142	265	265	228	228	95	95
BR009-SPBM01	SPBM11	277	277	158	158	133	133	166	166	157	157	110	110	345	345	170	170	147	147	333	333	243	243	152	152	334	334	260	260	157	157	185	185	129	129	100	100	294	294	140	169	144	144	267	267	228	228	85	85
BR010-KNPB01	KNPB07	277	277	158	158	111	111	166	166	157	157	110	110	341	341	170	170	149	149	333	333	243	243	152	152	334	334	260	260	153	153	166	166	158	158	100	100	294	294	169	169	0	0	265	265	230	230	89	89
BR011-KNBJ01	KNBJ06	277	277	158	160	133	133	166	166	151	151	110	110	345	345	170	170	149	149	333	333	243	243	152	152	336	336	260	260	153	153	185	185	156	158	100	100	294	294	169	169	142	142	265	265	230	230	95	95
BR016-KDHK01	KDHK09	277	281	158	158	154	154	166	166	157	157	110	110	345	345	170	170	149	149	333	333	243	243	152	152	334	334	260	260	153	153	185	185	160	160	100	100	288	288	169	169	144	144	269	269	230	230	85	85
BR016-KDSL01	KDSL07	277	277	146	156	133	154	166	166	153	157	110	110	345	345	170	178	147	147	333	333	243	243	152	152	334	334	260	278	153	163	185	185	158	158	100	100	288	294	169	169	144	144	267	271	230	230	89	89
BR016-KNML01	KNML07	277	277	148	148	133	133	166	166	153	153	110	110	345	345	170	170	147	147	333	345	243	243	152	152	334	334	260	260	153	153	185	185	158	158	100	100	294	294	169	169	142	142	265	265	228	228	95	95
BR016-KNPB01	KNPB03	277	277	158	158	152	152	166	166	157	157	110	110	345	345	170	170	149	149	333	333	243	243	152	152	334	336	260	260	153	153	185	185	158	158	100	100	294	294	157	169	144	144	267	267	230	230	95	95
BRA001-KDGC01	KDGC13	279	279	140	140	109	127	166	166	141	141	110	110	345	345	170	170	149	149	333	333	243	243	152	152	342	342	260	260	153	153	185	185	173	173	100	100	294	294	169	169	142	142	267	267	227	229	95	95
BRA001-KDGC03	KDGC08	277	277	158	158	155	155	166	166	141	151	110	110	345	345	170	170	141	141	333	333	243	243	152	152	334	334	260	260	153	153	185	185	160	160	100	100	294	294	169	169	142	142	267	267	228	228	85	85
BRA001-KDPD01	KDPD14	281	281	158	158	133	133	166	166	151	151	110	110	345	345	170	170	147	147	333	333	243	243	152	152	334	334	260	260	153	153	185	185	177	177	100	100	294	294	169	169	142	142	265	265	228	228	91	91
BRA001-PLPB01	PLPB05	277	277	160	160	133	133	166	166	157	157	110	110	346	346	170	170	149	149	333	333	243	243	152	152	334	334	260	260	133	133	185	185	158	158	100	100	288	288	169	169	144	144	267	267	228	228	89	89
BRA001-TRJH01	TRJH03	277	277	136	136	133	133	166	166	151	151	110	110	324	324	170	170	147	147	333	333	243	243	152	152	344	345	258	258	153	153	185	185	153	172	100	100	288	288	169	169	142	142	265	265	232	232	85	85
BRA003-KDGC01	KDGC14	277	277	140	140	133	133	166	166	151	151	110	110	345	345	178	178	149	149	345	345	243	243	152	152	334	334	260	260	143	143	185	185	160	160	100	100	294	294	169	169	142	142	267	267	227	229	85	85
BRA003-PLPB01	PLPB06	277	277	160	160	143	143	166	166	157	157	112	112	345	345	170	170	149	149	333	333	243	243	152	152	334	334	260	260	153	153	185	185	129	129	100	100	288	288	169	169	142	142	267	267	228	228	91	91
BRA004-KDGC01	KDGC17	279	279	140	140	133	133	166	166	141	141	110	110	345	345	170	170	149	149	333	333	243	243	152	152	342	342	260	260	153	153	185	185	172	172	100	100	294	294	169	169	141	141	267	267	228	228	95	95
BRA005-KDGC01	KDGC11	281	281	140	140	108	133	166	166	141	141	110	110	345	345	170	170	149	149	333	333	243	243	152	152	334	334	260	260	153	153	185	185	160	160	100	100	294	294	169	169	142	142	265	265	227	229	91	91
BRA005-KNMA01	KNMA02	277	277	158	158	111	133	166	166	151	151	110	110	345	345	170	170	149	149	333	333	243	243	152	152	336	336	260	260	153	153	185	185	158	158	100	100	294	294	169	169	144	144	265	265	230	230	89	89
BRA006-PLPB01	PLPB14	277	277	156	156	155	155	156	156	147	147	110	110	345	345	170	170	147	147	333	333	243	243	152	152	334	334	260	260	153	153	185	185	168	168	94	94	288	288	169	169	142	142	265	265	228	228	89	89
BRA007-KDSL01	KDSL08	277	277	148	148	133	133	166	166	155	155	104	104	345	345	178	178	149	149	333	333	243	243	152	152	342	342	260	260	153	153	185	185	158	158	100	100	294	294	169	169	142	142	269	269	228	228	85	85
BRA007-KNBJ01	KNBJ07	0	0	158	158	109	140	166	166	151	151	110	110	345	345	170	170	147	147	333	333	243	243	152	152	0	0	260	260	151	151	185	185	156	156	100	100	294	294	169	181	0	0	267	267	228	228	89	89
BRA007-KNMA01	KNMA06	277	277	158	158	111	133	166	166	153	153	110	110	345	345	170	170	149	149	333	333	243	243	152	152	336	336	260	260	153	153	185	185	158	158	100	100	294	294	169	169	142	142	265	265	230	230	95	95
BRA007-KNPB01	KNPB08	277	277	158	158	111	133	166	166	151	151	110	110	345	345	170	170	145	145	333	333	243	243	152	152	334	334	260	260	153	153	185	185	158	158	100	100	294	294	169	169	142	142	265	265	230	230	95	95
BRA008-KDHK01	KDHK15	277	277	158	158	109	133	166	166	153	153	110	110	345	345	170	170	147	147	333	333	243	243	152	152	0	0	260	260	153	153	185	185	156	156	100	100	294	294	169	169	144	144	267	267	228	228	89	89
BRA008-KNBJ01	KNBJ08	277	277	140	140	109	140	166	166	151	151	110	110	345	345	170	170	149	149	333	333	243	243	152	152	0	0	260	260	151	151	185	185	158	160	100	100	294	294	169	169	0	0	267	267	228	228	89	89
BRA008-KNPB01	KNPB10	277	277	140	140	133	133	166	166	153	153	110	110	325	325	170	170	147	147	333	333	243	243	152	152	334	334	260	260	153	153	185	185	129	129	100	100	294	294	169	169	142	142	265	265	228	228	89	89
BRA008-PLPB01	PLPB15	277	277	160	160	133	133	166	166	157	157	110	110	345	345	170	170	147	147	333	333	243	243	152	152	334	334	260	260	133	133	185	185	158	158	100	100	288	288	169	169	144	144	267	267	228	228	89	89
BRA009-KDKM01	KDKM18	277	277	148	148	133	133	166	166	157	157	110	110	316	316	170	170	147	147	333	333	243	243	152	152	334	334	260	260	153	153	185	185	158	158	100	100	294	294	169	169	142	142	267	267	228	228	91	91
BRA009-KDPD01	KDPD19	277	277	146	146	154	154	166	166	153	153	110	110	345	345	170	170	149	149	333	333	243	243	152	152	334	334	260	260	153	153	185	185	158	158	100	100	294	294	169	169	144	144	269	269	228	228	91	91
BRA009-SLSB01	SLSB15	277	277	146	146	132	132	140	166	141	141	110	110	323	323	170	170	147	147	345	345	243	243	152	152	334	334	260	260	153	153	185	185	172	172	100	100	294	294	169	169	0	0	265	265	228	228	89	89
BRA010-SLSB01	SLSB16	279	279	140	140	132	132	150	166	151	151	112	112	345	345	152	186	145	145	333	333	243	243	152	152	336	336	260	260	153	153	183	183	158	158	94	94	294	294	169	169	0	0	269	269	228	228	95	95
BRA012-KDGC01	KDGC15	277	277	156	156	132	132	140	166	141	153	110	110	345	345	170	170	149	149	345	345	243	243	152	152	342	342	260	260	149	153	185	185	160	160	100	100	294	294	169	169	142	142	267	267	228	228	91	91
BRA019-KDKM01	KDKM17	281	281	148	148	154	154	166	166	153	153	110	110	345	345	170	170	149	149	333	333	243	243	152	152	342	342	260	260	151	151	185	185	160	168	100	100	288	288	169	169	142	142	267	267	230	230	89	89
BRA019-SLSB01	SLSB09	277	277	148	156	155	155	166	166	157	157	110	110	345	345	170	170	147	147	333	333	243	243	152	152	336	336	260	260	153	153	185	185	158	158	100	100	288	288	169	169	0	0	271	271	228	230	89	89
BRA020-SLSB01	SLSB10	277	277	156	156	133	133	156	156	157	157	112	112	345	345	190	190	145	145	333	333	243	243	152	152	0	0	260	260	153	153	185	185	127	127	100	100	288	288	142	169	142	142	265	265	228	228	89	89
BRA022-SLSB01	SLSB11	277	277	146	146	132	132	140	140	141	141	110	110	345	345	170	170	147	147	345	345	243	243	152	152	0	0	260	260	153	153	185	185	172	172	100	100	294	294	169	169	0	0	265	265	228	228	89	89
BH001-KDGC01	KDGC05	277	277	140	140	133	133	166	166	157	157	110	110	345	345	170	170	149	149	333	333	243	243	152	152	334	334	260	260	153	153	185	185	152	152	100	100	294	294	169	169	142	166	265	265	228	228	95	95
BH001-PLGH01	PLGH06	277	277	146	146	152	152	166	166	155	155	110	110	345	345	170	170	149	149	333	333	243	243	152	152	336	336	260	260	153	153	185	185	158	158	100	100	294	294	169	169	142	142	265	265	230	230	95	95
BH002-KDSL01	KDSL12	277	277	148	148	155	155	166	166	153	153	110	110	345	345	170	170	149	149	333	333	243	243	152	152	332	332	260	260	155	155	185	185	127	127	100	100	294	294	169	169	144	144	265	265	227	229	85	85
BH002-SPBM01	SPBM07	277	277	158	158	133	133	166	166	151	157	110	110	345	345	170	170	149	149	333	333	243	243	152	152	336	336	260	260	153	153	185	185	158	158	100	100	294	294	169	169	144	144	265	265	232	232	89	89
BH002-TRJH01	TRJH05	277	277	136	136	109	133	166	166	155	155	110	110	345	345	170	170	149	149	333	333	243	243	152	152	336	336	258	258	153	153	185	185	156	156	100	100	294	294	169	169	142	142	265	265	228	228	89	89
BHA001-KDGC01	KNML13	279	279	154	154	109	154	166	166	141	141	108	108	349	349	170	170	151	151	333	333	243	243	152	152	0	0	278	278	159	159	187	187	160	160	88	88	88	88	166	166	144	144	265	265	227	229	93	93
BHA002-KNML01	KNML15	277	277	154	154	154	154	166	166	157	157	110	110	341	341	170	170	147	147	333	333	243	243	152	152	332	332	278	278	159	159	187	187	129	129	104	104	104	104	169	169	144	144	265	265	228	228	89	89
BHA002-KNPB01	KNPB11	277	277	154	154	154	154	166	166	157	157	110	110	345	345	170	170	147	147	333	333	243	243	152	152	334	334	278	278	159	159	187	187	129	129	104	104	288	288	169	169	142	142	265	265	228	228	89	89
BHA002-SLSB01	SLSB12	279	279	154	154	152	152	156	156	141	141	106	106	323	323	170	170	151	151	333	333	271	271	152	152	334	334	278	278	159	159	187	187	129	129	104	104	294	294	166	166	142	142	265	265	228	228	85	85
BHA004-KNPB01	KNPB13	277	277	154	154	154	154	166	166	157	157	110	110	345	345	170	170	147	147	333	333	243	243	152	152	334	334	278	278	159	159	187	187	129	129	104	104	288	288	169	169	144	144	265	265	228	228	89	89
BHA004-SLSB01	SLSB13	277	277	154	154	154	154	166	166	157	157	110	110	345	345	170	170	147	147	333	333	243	243	152	152	334	334	278	278	159	159	187	187	129	129	104	104	288	288	169	169	144	144	265	265	228	228	89	89
BHA005-KDSL01	KDSL13	277	277	154	154	154	154	166	166	157	157	110	110	335	335	170	170	147	147	333	333	243	243	152	152	334	334	278	278	159	159	187	187	129	129	104	104	288	288	169	169	144	144	265	265	227	229	89	89
BHA005-KNMA01	KNMA07	0	0	154	154	154	154	156	156	159	159	110	110	341	341	170	170	147	147	333	333	243	243	152	152	0	0	278	278	159	159	187	187	129	129	104	104	288	288	169	169	0	0	267	267	228	228	91	91
BHA006-SLSB01	SLSB14	277	277	154	154	154	154	156	166	157	157	110	110	345	345	170	170	147	147	333	333	243	243	152	152	334	334	278	278	159	159	187	187	129	129	104	104	288	288	169	169	144	144	265	265	228	228	89	89
BHA016-SPBM01	SPBM13	279	279	154	154	152	152	156	156	153	153	112	112	324	324	170	170	151	151	331	331	243	243	152	152	332	332	278	278	155	155	187	187	160	160	104	104	288	288	169	169	142	156	265	265	228	228	85	85
SbLr01	Lr005	277	277	146	146	155	155	165	165	147	147	104	104	345	345	170	170	147	147	341	341	243	243	152	152	334	334	260	260	157	157	185	185	129	129	94	94	288	288	169	169	142	142	265	265	228	228	95	95
SbLr02	Lr008	283	283	142	142	139	139	151	151	147	147	126	126	345	345	174	174	151	151	343	343	235	235	148	148	348	348	266	266	141	141	181	181	154	154	100	100	294	294	163	163	143	143	271	271	232	232	93	93
SbLr03	Lr010	279	279	146	146	139	139	151	151	153	153	128	128	345	345	168	168	151	151	333	333	235	235	148	148	350	350	266	266	133	133	191	191	129	129	100	100	294	294	163	163	142	142	271	271	230	230	93	93
SbLr04	Lr006	279	279	167	167	120	120	157	157	143	143	106	106	345	345	190	190	149	149	341	341	279	279	152	152	360	360	282	282	155	155	189	189	129	129	102	102	294	294	166	166	142	142	265	265	232	232	85	85
SbLr05	Lr007	281	281	142	142	154	154	151	151	145	145	128	128	345	345	174	174	151	151	333	333	235	235	148	148	350	350	266	266	139	139	189	189	145	145	100	100	294	294	169	169	170	170	271	271	232	232	97	97
SbLr06	Lr009	279	279	146	146	139	139	151	151	153	153	128	128	345	345	168	168	151	151	333	333	235	235	148	148	350	350	266	266	133	133	189	189	129	129	100	102	294	294	163	163	142	164	271	271	230	230	93	93
SbLr07	Lr011	279	279	144	144	139	139	151	151	137	137	114	114	345	345	170	170	151	151	333	333	235	235	148	148	348	348	266	266	139	139	181	181	156	156	100	100	294	294	169	169	142	142	271	271	230	230	93	93
SbLr08	Lr012	279	279	158	158	158	158	149	149	145	145	110	110	345	345	178	178	151	151	333	333	235	235	150	150	352	352	264	264	137	137	191	191	150	150	100	100	294	294	163	163	164	164	271	271	230	230	93	93
SbLr09	Lr013	279	279	146	146	139	139	151	151	165	165	128	128	345	345	174	174	151	151	333	333	235	235	148	148	350	350	266	266	137	137	189	189	154	154	90	90	294	294	163	163	142	142	271	271	230	230	93	93
SbLr10	Lr014	279	279	161	161	120	120	149	149	143	143	110	110	345	345	158	158	151	151	333	333	235	235	150	150	350	350	266	266	137	137	191	191	154	154	102	138	294	294	163	163	142	142	271	271	230	230	95	95
SbLr11	Lr015	279	279	156	156	120	120	151	151	135	135	116	116	345	345	180	180	153	153	333	333	235	235	148	148	348	348	266	266	139	139	181	181	152	152	100	100	294	294	169	169	0	0	271	271	230	230	93	93
SbLr12	Lr016	279	279	156	156	120	120	149	149	143	143	114	114	345	345	170	170	151	151	333	333	235	235	148	148	348	348	266	266	137	137	181	181	137	137	100	100	294	294	169	169	142	142	271	271	230	230	93	93
SbLr13	Y78	279	279	152	152	156	156	151	151	151	151	114	114	345	345	158	158	151	151	333	333	235	235	148	148	351	351	266	266	136	136	181	181	152	154	96	96	293	293	169	169	142	142	271	271	230	230	93	93
SbLr14	Y79	279	279	142	142	156	156	149	149	147	147	114	114	345	345	158	158	151	151	333	333	235	235	148	148	353	353	266	266	135	135	181	181	152	154	100	100	294	294	169	169	142	142	271	271	230	230	93	93
SbLr15	Y80	279	279	154	156	156	156	152	152	153	153	114	114	345	345	174	174	151	151	333	333	235	235	152	152	349	349	266	266	131	131	181	181	156	156	100	100	293	293	169	169	142	142	271	271	230	230	95	95
SbLr16	Y81	277	277	152	154	0	0	149	149	151	153	126	126	345	345	158	158	153	153	333	333	235	235	150	150	351	351	266	266	135	135	0	0	0	0	100	100	294	294	163	163	142	142	271	271	0	0	0	0
SbLr17	Y82	279	279	152	154	156	156	152	152	155	165	128	128	345	345	170	170	151	151	333	333	235	235	148	148	349	349	266	296	136	136	181	181	156	160	100	100	294	294	163	163	0	0	271	271	230	230	93	93
SbLr18	Y83	279	279	142	142	0	0	150	150	135	135	114	114	345	345	158	158	153	153	333	333	235	235	148	148	349	349	266	266	138	138	181	181	152	154	100	100	294	294	169	169	142	142	271	271	0	0	0	0
SbLr19	Y84	277	277	140	140	133	133	166	166	157	157	110	110	345	345	170	170	145	145	333	333	243	243	152	152	335	335	260	260	154	154	185	185	164	168	100	100	288	288	169	169	143	143	267	267	230	230	89	89
SbLr20	Y85	279	279	142	142	120	120	149	149	145	145	114	114	345	345	158	158	151	151	333	333	235	235	148	148	349	349	266	266	138	138	181	181	152	156	100	100	293	293	163	163	142	142	271	271	230	230	93	93
SbLr21	Y86	277	277	140	140	155	155	166	166	153	155	104	104	345	345	170	170	145	145	333	333	243	243	152	152	335	335	260	260	152	152	185	185	129	129	94	94	288	288	169	169	142	142	267	267	228	228	89	89
SbLr22	Y87	277	277	144	144	156	156	149	149	153	153	114	114	345	345	158	158	151	151	341	341	235	235	150	150	353	353	264	264	136	136	181	181	152	152	100	100	294	294	163	163	143	173	271	271	230	230	93	93
SbLr23	Y88	277	277	140	140	133	133	166	166	143	143	112	112	345	345	170	170	145	145	333	333	243	243	152	152	336	336	282	282	154	154	185	185	129	129	94	94	294	294	169	169	142	142	265	265	228	228	101	101
SbLr24	Y89	279	279	144	144	139	139	152	152	135	135	116	116	345	345	176	176	151	151	343	343	235	235	148	148	351	351	266	266	138	138	181	181	152	152	100	100	294	294	169	169	142	142	271	271	230	230	93	93
SbLr25	Y90	279	279	142	142	156	156	149	149	137	137	116	116	345	345	178	178	151	151	0	0	235	235	148	148	349	349	266	266	0	0	181	181	152	154	100	100	0	0	163	163	141	141	272	272	230	230	93	93
SbLr26	Y91	279	279	154	154	154	154	152	152	137	137	116	116	345	345	174	174	154	154	333	333	236	236	148	148	349	349	0	0	136	136	191	191	139	143	90	90	293	293	163	163	142	172	272	272	230	230	97	97
SbLr27	Y92	277	277	148	148	120	120	150	150	151	151	126	126	345	345	158	158	151	151	343	343	236	236	150	150	353	353	266	276	136	136	189	189	152	154	100	100	293	293	163	163	172	172	272	272	230	230	93	93
trop jap01	Ahrent_065	279	279	158	158	120	120	151	151	159	159	127	127	345	345	168	168	151	151	333	333	234	234	148	148	334	334	266	266	135	135	191	191	158	158	90	90	288	288	169	169	142	142	271	271	230	230	95	95
trop jap02	Alan_096	279	279	158	158	139	139	151	151	159	159	114	114	345	345	170	170	155	155	333	333	234	234	148	148	348	348	266	266	135	135	191	191	158	158	90	90	288	288	163	163	142	142	271	271	230	230	95	95
trop jap03	Starbonnet_085	279	279	158	158	156	156	151	151	151	151	127	127	345	345	168	168	151	151	333	333	234	234	148	148	0	0	266	266	135	135	181	181	158	158	98	98	294	294	163	163	142	142	271	271	230	230	92	92
trop jap04	Tebonnet_086	279	279	158	158	120	120	151	151	143	143	114	114	345	345	170	170	151	151	333	333	234	234	148	148	348	348	266	266	135	135	181	181	158	158	0	0	294	294	169	169	142	142	271	271	230	230	95	95
trop jap05	Zenith_PI389996_078	0	0	146	146	140	140	159	159	123	123	104	104	328	328	168	168	135	135	375	375	219	219	160	160	336	336	280	280	135	151	173	173	129	129	103	103	297	297	163	163	147	147	267	267	230	230	100	100
trop jap06	Millie_077	279	279	158	158	156	156	149	149	159	159	114	114	345	345	170	170	155	155	333	333	234	234	148	148	348	348	266	266	135	135	181	181	158	158	90	90	294	294	169	169	142	142	267	267	230	230	95	95
trop jap07	Newbonnet_019	279	279	158	158	139	139	151	151	151	151	114	114	345	345	170	170	151	151	333	333	234	234	148	148	351	351	266	266	135	135	191	191	158	158	98	98	294	294	163	163	142	142	271	271	230	230	95	95
trop jap08	CIor7787_Zenith_017	279	279	142	142	154	154	149	149	147	147	116	116	345	345	158	158	155	155	333	333	234	234	148	148	351	351	266	266	141	141	183	183	152	152	90	90	294	294	169	169	0	0	271	271	230	230	92	92
trop jap09	Belle_Patna_051	279	279	158	158	156	156	151	151	159	159	114	114	345	345	170	170	151	151	333	333	234	234	148	148	351	351	266	266	135	135	181	181	158	158	90	90	294	294	163	163	142	142	271	271	230	230	92	92
trop jap10	Gulfmont_023	279	279	158	158	139	139	149	149	137	137	114	114	345	345	170	170	151	151	333	333	234	234	148	148	334	334	266	266	135	135	181	181	158	158	90	90	294	294	169	169	142	142	271	271	230	230	92	92
trop jap11	Jackson_073	279	279	158	158	139	156	151	151	159	159	114	114	345	345	170	170	151	151	333	333	234	234	148	148	348	348	266	266	135	135	181	181	158	158	90	90	288	288	163	163	142	142	267	267	230	230	92	92
trop jap12	Lemont_004	279	279	158	158	139	139	151	151	137	137	114	114	345	345	170	170	151	151	333	333	234	234	148	148	334	334	266	266	135	135	181	181	156	156	90	90	294	294	169	169	142	142	271	271	230	230	92	92
trop jap13	Rexmont_028	279	279	158	158	156	156	151	151	143	143	114	114	345	345	170	170	151	151	333	333	234	234	148	148	334	334	266	266	135	135	181	181	158	158	90	90	294	294	163	163	0	0	271	271	230	230	92	92
trop jap14	REXORO_PI389995_103	279	279	162	162	156	156	151	151	151	151	115	115	345	345	170	170	151	151	333	333	234	234	148	148	348	348	266	266	135	135	181	181	158	158	90	90	294	294	169	169	142	142	271	271	230	230	92	92
trop jap15	GPNO20199 CIor11022	279	279	164	164	154	154	151	151	151	151	129	129	328	328	174	174	153	153	333	333	234	234	148	156	351	351	266	266	141	141	191	191	156	156	90	90	294	294	156	156	143	143	271	271	230	230	92	92
trop jap16	Blue_Rose_CIor_1762_099	279	279	156	156	120	120	159	159	147	147	112	112	345	345	158	158	153	153	333	333	234	234	144	148	351	351	266	266	141	141	191	191	140	140	90	90	294	294	169	169	142	142	271	271	230	230	96	96
trop jap17	Blue_Rose_PI388361_081	279	279	156	156	120	120	159	159	149	149	112	112	328	328	158	158	153	155	344	344	234	234	156	156	351	351	266	266	133	133	191	191	140	140	98	98	294	294	156	156	140	140	271	271	230	230	96	96
trop jap18	Saturn_053	279	279	146	146	120	120	149	149	159	159	112	112	345	345	168	168	151	151	333	333	234	234	148	148	351	351	266	266	141	141	191	191	158	158	90	90	294	294	163	163	142	142	271	271	230	230	95	95
trop jap19	Lacassine_PI548772_070	279	279	158	158	139	139	151	151	151	151	114	114	345	345	170	170	151	151	333	333	234	234	148	148	334	334	266	266	135	135	191	191	158	158	90	90	294	294	169	169	142	142	271	271	230	230	95	95
PMOr01	OR01_Kd	277	277	146	146	132	132	165	165	141	157	110	110	345	345	170	170	147	147	333	333	243	243	152	152	334	334	260	260	153	153	173	185	172	172	100.29	100.29	288	288	169	169	144	144	267	267	228	228	85	85
PMOr02	OR03_Kd	277	277	146	146	132	132	165	165	141	157	110	110	345	345	170	170	147	147	333	333	243	243	152	152	334	334	260	260	153	153	185	185	172	172	100.29	100.29	288	288	169	169	142	142	265	265	228	228	85	85
PMOr03	OR04_Kd	277	277	134	158	133	133	165	165	153	153	110	110	345	345	170	170	149	149	333	333	243	243	152	152	336	336	260	260	153	153	185	185	158	158	102	102	294	294	169	169	142	142	265	265	230	230	89	89
PMOr04	OR20_Kd	279	281	142	142	132	132	155	155	127	127	110	112	323	325	172	180	137	145	337	349	235	235	148	150	340	340	262	262	133	133	175	203	147	147	92	94	288	288	172	172	142	142	267	267	230	230	93	93
PMOr05	OR21_Kd	281	281	132	132	132	132	155	155	127	127	104	104	337	337	160	160	137	141	345	349	231	239	150	150	340	340	274	274	131	133	175	197	147	147	94	100	294	294	157	157	142	142	267	267	230	238	93	93
PMOr06	OR16_Kd	277	281	138	140	155	155	155	155	127	153	104	110	325	325	164	170	137	149	333	345	239	243	148	152	336	336	260	274	153	153	185	185	160	160	100	102	294	294	163	169	142	142	265	265	232	232	89	107
PMOr07	OR18_Kd	279	279	136	136	132	132	155	155	127	137	104	104	323	328	160	160	137	147	341	341	235	239	148	148	340	340	274	274	133	149	175	183	131	131	100	100	294	294	169	172	136	136	267	267	240	240	87	107
PMOr08	OR10_Kd	277	277	136	148	128	154	155	165	141	141	94	110	325	333	164	170	137	137	343	345	231	243	152	164	334	350	256	260	131	153	185	205	168	168	92	102	294	294	154	154	142	142	269	269	228	232	89	89
PMOr09	OR11_Kd	277	281	138	140	132	154	143	165	145	145	110	110	325	335	170	170	137	149	333	333	239	243	148	152	336	336	260	260	145	145	185	185	160	160	102	102	294	294	163	169	142	142	269	269	232	232	89	89
PMOr10	OR05_Kel	279	279	144	144	137	137	151	151	145	145	105	105	345	345	184	184	145	145	341	341	283	283	152	152	361	361	280	280	143	143	189	189	131	131	105	105	294	294	166	166	142	142	265	265	228	228	85	85
PMOr11	OR06_Kel	281	281	136	140	154	154	155	155	143	151	104	112	325	345	170	184	147	147	333	343	243	243	152	152	340	340	282	282	153	153	185	185	160	160	94	94	288	288	169	169	142	142	267	267	230	230	89	89
PMOr12	OR07_Kel	277	281	140	140	134	134	163	163	155	155	110	110	323	345	170	176	139	139	333	337	239	243	152	152	340	340	260	284	151	151	175	175	172	172	100	100	291	291	169	172	121	161	265	267	228	232	87	95
PMOr13	OR08_Kel	281	281	138	138	136	136	149	149	139	139	104	114	323	335	178	186	137	147	354	354	235	239	150	150	334	334	260	260	141	151	189	189	0	0	92	100	288	294	157	157	142	142	273	273	230	234	105	105
PMOr14	OR09_Kel	283	283	136	136	128	132	147	155	129	129	110	112	329	337	150	180	137	137	349	349	231	231	150	150	340	340	278	278	131	133	175	183	147	147	100	100	288	288	157	157	142	142	267	267	230	238	93	105
PMOr15	OR12_Kel	279	281	138	138	136	136	149	151	159	159	104	114	335	335	178	186	137	147	354	354	235	239	150	150	334	340	288	288	141	141	185	189	0	0	92	92	288	294	157	157	142	144	267	273	230	234	101	101
PMOr16	OR13_Kel	279	279	136	140	155	155	155	155	151	153	112	112	324	324	184	184	147	147	335	335	235	243	152	152	346	346	282	282	149	153	185	185	160	160	94	102	288	294	166	169	143	143	269	269	230	230	89	99
PMOr17	OR22_Kel	277	281	140	140	154	154	163	163	137	137	110	110	323	323	170	176	139	139	333	337	239	243	152	152	340	340	260	284	151	153	175	185	141	172	100	100	288	291	169	172	142	150	265	267	228	228	87	95
PMOr18	OR23_Kel	277	277	140	140	133	154	163	165	137	153	110	110	345	345	176	176	149	149	337	337	239	239	142	152	334	334	260	284	151	153	175	185	141	172	100	100	288	291	169	169	142	142	267	267	232	232	87	95
PMOr19	Y06	277	277	130	130	141	141	160	160	155	155	106	106	333	333	188	188	139	139	335	335	231	231	164	164	330	330	274	274	136	161	189	189	0	0	98	98	294	294	166	166	142	142	267	267	232	232	89	89
SEAOr01	Y07	281	281	152	154	139	139	162	162	141	141	108	108	337	337	176	176	147	147	335	335	231	231	162	162	330	330	266	276	150	150	191	191	131	135	102	102	294	294	0	0	142	142	267	267	232	232	85	85
SEAOr02	Y08	281	281	146	146	156	156	156	156	155	157	104	104	345	345	174	174	143	143	333	333	243	243	152	152	0	0	260	260	130	157	185	185	164	168	88	100	288	288	153	153	142	142	268	268	228	228	101	101
SEAOr03	Y09	281	281	152	152	120	120	166	166	157	157	112	112	325	325	174	174	143	143	345	345	243	243	152	152	335	335	260	260	157	157	185	185	164	169	100	100	288	288	169	169	142	142	268	268	228	228	101	101
SEAOr04	Y10	277	277	146	146	154	154	156	156	155	155	112	112	345	345	198	200	143	143	0	0	243	243	152	152	335	335	280	282	155	155	185	185	135	139	94	94	0	0	153	153	144	144	267	267	230	230	95	95
SEAOr05	Y11	277	277	148	148	131	131	156	158	153	155	112	112	345	345	187	187	145	145	333	333	232	232	152	152	335	335	280	282	155	155	189	193	148	150	100	100	288	293	169	169	142	142	268	268	230	230	87	87
SEAOr06	Y12	277	277	140	148	132	156	162	162	143	143	106	106	337	345	168	168	145	145	335	335	243	243	154	154	337	337	272	272	148	148	183	183	130	147	88	88	293	293	163	169	142	142	268	268	228	228	87	89
SEAOr07	Y13	285	285	150	150	142	142	162	162	149	149	108	108	337	337	180	180	143	143	337	337	239	239	162	162	334	334	280	280	138	138	179	179	133	137	96	96	294	294	162	162	141	141	267	267	230	230	87	87
SEAOr08	Y14	279	279	140	153	141	141	162	162	159	159	113	128	333	333	180	180	137	137	337	337	275	275	159	159	332	332	286	289	152	152	189	189	137	141	84	84	294	294	165	165	142	142	267	267	238	238	85	85
SEAOr09	Y15	281	281	132	132	132	132	162	162	147	147	120	120	329	329	178	178	143	143	339	339	231	231	164	164	334	334	278	278	134	134	185	185	131	135	84	84	294	294	169	169	142	142	268	268	228	228	0	0
SEAOr10	Y16	279	279	140	140	135	135	162	162	151	151	99	99	325	325	182	182	136	136	341	341	279	279	164	164	332	332	284	288	129	129	187	187	131	135	84	84	294	294	165	165	142	142	268	268	228	228	85	85
SEAOr11	Y17	277	277	152	152	131	131	160	160	147	147	99	99	333	333	168	168	149	149	339	339	267	267	158	164	334	334	266	276	138	138	185	185	133	137	96	96	294	294	153	153	142	142	267	267	228	228	85	85
SEAOr12	Y18	279	279	144	144	137	137	152	152	145	145	106	106	345	345	184	184	145	145	341	341	283	283	152	152	360	360	280	280	142	142	189	189	131	135	104	104	294	294	166	166	142	142	265	265	228	228	85	85
SEAOr13	Y19	277	277	152	152	154	154	160	160	153	153	112	112	325	325	183	183	143	143	333	333	243	243	152	152	335	335	266	282	132	132	185	185	137	141	88	88	293	294	153	153	144	144	268	268	228	228	101	101
SEAOr14	Y20	277	277	144	144	155	155	160	160	155	155	110	110	345	345	184	184	143	143	345	345	243	243	164	164	335	335	284	286	132	132	185	185	137	141	88	88	288	288	153	153	140	140	267	267	228	228	93	93
SEAOr15	Oruf08	281	281	138	138	133	133	163	163	145	145	124	124	323	323	178	178	137	137	349	349	239	239	148	148	346	346	260	260	130	130	175	181	141	141	92	94	294	294	154	169	144	144	271	271	240	240	99	99
SEAOr16	Oruf09	279	279	134	138	132	147	149	159	139	157	104	104	325	325	164	170	141	141	331	337	231	251	152	164	330	336	258	282	145	147	175	179	129	137	100	102	294	294	163	169	142	142	267	267	232	232	93	95
SEAOr17	Oruf10	281	281	146	146	157	157	155	155	157	157	104	112	334	345	174	174	143	143	333	333	243	243	152	152	334	334	260	260	157	157	185	185	168	168	88	88	288	288	154	154	142	142	269	269	228	228	83	99
SEAOr18	Oruf11	281	281	152	152	120	120	155	155	157	157	112	112	325	325	174	174	143	143	345	345	243	243	152	152	334	334	260	260	157	157	185	185	168	168	100	100	288	288	169	169	142	142	269	269	228	228	99	99
SEAOr19	Oruf12	281	281	152	152	121	121	155	155	157	157	112	112	325	325	174	174	143	143	345	345	243	243	152	152	334	334	260	260	157	157	185	185	168	168	100	100	288	288	169	169	142	142	267	267	228	228	99	99
SEAOr20	Oruf13	277	277	146	146	155	155	155	155	155	155	112	112	345	345	200	200	143	143	333	333	243	243	152	152	334	334	282	282	159	159	185	185	135	135	94	94	288	288	154	154	144	144	267	267	230	230	95	95
SEAOr21	Oruf14	277	277	148	148	132	132	155	157	145	145	112	112	345	345	188	188	145	145	333	333	231	231	152	152	334	334	282	282	155	155	185	213	150	150	100	100	288	288	169	169	142	142	269	269	230	230	87	87
SEAOr22	Oruf15	285	285	150	150	143	143	161	161	149	149	108	108	337	337	178	178	143	143	337	337	239	239	162	162	334	334	280	280	139	139	179	179	133	133	88	88	294	294	163	163	142	142	267	267	230	230	87	87
SEAOr23	Oruf16	281	281	140	140	142	142	161	161	157	157	130	130	333	333	180	180	137	137	337	337	275	275	156	156	332	332	290	290	153	153	187	187	137	137	84	84	294	294	166	166	142	142	265	265	0	0	85	85
SEAOr24	Oruf17	281	281	140	140	156	156	147	147	145	145	94	94	323	323	170	170	137	137	349	349	239	239	148	148	330	330	258	258	130	145	185	185	141	141	92	92	294	294	154	154	142	142	271	271	232	232	97	97
SEAOr25	Oruf18	281	281	152	152	157	157	155	155	153	153	112	112	337	345	184	184	145	145	335	335	231	231	152	152	334	334	260	260	155	155	167	167	129	129	100	100	288	294	169	169	142	142	269	269	230	230	95	95
SEAOr26	Oruf19A	0	0	146	146	154	154	153	153	173	173	112	112	0	0	146	152	145	145	333	333	243	243	152	152	0	0	260	260	133	133	185	185	131	131	94	100	288	288	169	169	0	0	267	267	228	228	81	111
SEAOr27	Oruf01	277	277	146	146	155	155	165	165	155	155	110	110	324	324	170	170	149	149	333	333	243	243	152	152	334	334	278	278	153	153	185	185	129	129	102	102	288	288	169	169	143	143	265	265	230	230	89	89
SEAOr28	Oruf02	279	279	148	148	129	129	155	155	161	161	106	106	345	345	184	184	149	149	333	333	243	243	152	152	334	334	264	264	153	153	192	192	160	160	103	103	294	294	166	166	144	144	267	267	228	228	85	85
SEAOr29	Oruf03	279	279	142	142	131	131	165	165	141	141	110	110	345	345	170	170	149	149	333	333	243	243	152	152	336	336	260	260	153	153	192	192	166	166	94	94	294	294	157	157	144	144	265	265	230	230	95	95
KN 1	Y31	277	277	140	140	133	133	166	166	143	143	112	112	345	345	198	200	145	145	333	333	243	243	152	152	336	336	260	260	152	152	185	185	160	164	100	100	288	288	169	169	142	142	265	265	228	228	95	95
KN 2	Y32	277	277	140	140	133	133	166	166	147	155	104	104	345	345	170	170	145	145	333	333	243	243	152	152	348	348	260	260	156	156	185	185	164	168	94	94	288	288	163	163	142	142	267	267	228	228	95	95
KN 3	Y33	279	281	140	150	155	155	166	166	149	149	110	112	345	345	170	170	145	149	333	333	243	247	152	152	343	345	260	260	156	156	189	189	129	133	100	100	288	288	162	162	142	142	268	268	228	230	91	95
KN 4	Y34	281	281	156	158	133	133	150	150	153	155	110	110	345	345	170	170	145	145	333	333	243	243	152	152	335	335	260	260	154	154	189	189	160	164	100	100	288	288	163	163	142	142	265	265	228	228	89	89
KN 5	Y35	279	279	140	140	156	156	166	166	139	139	112	112	345	345	170	170	145	145	333	333	243	243	152	152	337	337	260	260	155	155	183	183	160	164	100	100	293	293	163	163	142	142	265	265	228	228	95	95
KN 6	Y36	277	277	146	146	156	156	166	166	149	149	112	112	345	345	184	184	145	145	333	333	243	243	152	152	345	345	260	260	156	156	169	169	156	160	100	100	287	287	163	169	142	142	267	267	228	228	95	95
KN 7	Y37	277	277	154	158	133	133	166	166	149	149	112	112	345	345	198	200	145	145	333	333	243	243	152	152	345	345	260	260	150	150	185	185	160	164	94	94	288	288	163	169	143	143	267	267	228	228	95	95
KN 8	Y38	281	281	140	140	133	133	166	166	149	149	112	112	345	345	170	170	145	145	333	333	243	243	152	152	335	335	260	260	150	150	185	185	156	160	100	100	288	288	169	169	142	142	267	267	228	228	95	95
KN 9	Y39	0	0	0	0	133	133	166	166	153	153	108	108	0	0	170	170	145	145	333	333	243	243	152	152	348	348	260	260	152	152	185	185	129	133	94	94	288	288	169	169	142	142	265	265	230	230	95	95
KN 10	Y40	279	279	140	140	133	133	166	166	149	149	112	112	345	345	198	200	145	145	333	333	243	243	152	152	345	345	260	260	150	150	185	185	129	133	94	94	294	294	169	169	142	142	267	267	228	228	95	95
KN 11	Y41	277	277	156	158	133	133	166	166	149	149	112	112	345	345	170	170	145	145	333	333	243	243	152	152	336	336	260	260	150	150	185	185	146	156	94	94	288	288	169	169	142	142	265	265	230	230	95	95
KN 12	Y42	279	279	140	140	133	133	166	166	149	149	112	112	345	345	170	170	145	145	0	0	243	243	152	152	345	345	260	260	0	0	185	185	164	168	100	100	0	0	169	169	143	143	266	266	228	228	95	95
KN 13	Y43	277	277	140	140	133	133	166	166	149	149	112	112	345	345	170	170	145	145	333	333	243	243	152	152	335	335	260	260	150	150	185	185	156	160	94	94	288	288	169	169	142	142	265	265	230	230	95	95
KN 14	Y44	277	277	140	140	133	133	166	166	151	151	110	110	345	345	170	170	145	145	333	333	243	243	152	152	336	336	262	262	150	150	185	185	164	168	100	100	293	293	168	169	142	142	267	267	228	228	95	95
KN 15	Y45	279	279	140	152	133	155	166	166	141	147	110	112	345	345	170	197	145	145	333	333	243	243	152	152	336	336	260	260	150	152	185	185	160	164	94	94	288	288	168	168	142	142	267	267	228	228	95	95
KN 16	Y46	277	277	142	142	158	158	149	149	149	149	110	110	345	345	158	158	151	151	341	341	235	235	150	150	0	0	266	266	131	131	181	181	129	129	100	100	294	294	163	163	170	173	271	271	230	230	93	93
KN 17	Y47	279	279	154	158	156	156	152	152	159	161	116	116	345	345	174	174	151	151	341	341	235	235	148	148	351	351	266	266	138	138	191	191	145	145	100	100	294	294	163	163	170	170	271	271	232	232	93	93
KN 18	Y48	279	279	144	144	121	121	149	149	151	151	126	126	345	345	174	174	151	151	333	333	235	235	148	148	349	349	266	266	136	136	191	191	129	129	100	100	293	293	163	163	142	142	271	271	232	232	95	95
KN 19	Y49	279	279	142	142	139	139	149	149	141	141	126	126	345	345	174	174	151	151	333	333	235	235	148	148	349	349	266	266	131	131	189	189	129	129	100	100	294	294	163	163	143	170	271	271	230	230	93	93
KN 20	Y50	279	279	144	144	131	131	152	152	155	159	126	126	345	345	174	174	151	151	333	333	235	235	148	148	349	349	266	266	136	136	189	189	143	143	100	100	293	293	169	169	154	172	271	271	232	232	97	97
KN 21	Y51	277	277	156	158	155	155	166	166	149	149	112	112	345	345	170	170	147	147	0	0	243	243	152	152	345	345	260	260	0	0	185	185	160	164	94	94	0	0	169	169	142	142	268	268	230	230	95	95
KN 22	Y52	279	279	142	142	156	156	152	152	136	156	126	126	345	345	174	174	151	151	333	333	235	235	148	148	351	351	266	266	136	136	191	191	164	168	100	100	294	294	163	163	154	173	271	271	230	230	93	93
KN 23	Y53	279	279	146	146	139	139	149	149	155	155	126	126	345	345	174	174	151	151	341	341	235	235	148	148	349	349	266	266	131	131	189	189	160	164	100	100	294	294	163	163	142	142	271	271	230	230	93	93
KN 24	Y54	279	279	156	158	155	155	166	166	151	151	104	104	345	345	170	170	145	145	333	333	243	243	152	152	335	335	260	260	154	154	185	185	128	128	94	94	293	293	169	169	143	143	268	268	228	228	95	95
KN 25	Y55	279	279	156	158	155	155	166	166	151	151	104	104	345	345	170	170	145	145	333	333	243	243	152	152	335	335	260	260	138	138	185	185	145	145	94	94	293	293	169	169	143	143	267	267	228	228	95	95
KN 26	Y56	277	277	152	152	133	133	166	166	157	157	112	112	337	337	170	170	145	145	333	333	243	243	152	152	337	337	260	260	159	159	185	185	129	129	100	100	294	294	169	169	142	142	265	265	228	228	95	95
KN 27	Y57	277	277	140	140	133	133	166	166	143	143	112	112	345	345	170	170	145	145	333	333	243	243	152	152	335	335	260	260	142	142	185	185	129	129	100	100	288	288	169	169	142	142	265	265	230	230	95	95
KN 28	Y58	277	277	150	150	133	133	166	166	145	145	112	112	345	345	170	170	145	145	333	333	243	243	152	152	337	337	260	260	159	159	185	185	143	143	94	94	288	288	169	169	142	142	265	265	230	230	89	89
KN 29	Y59	281	281	140	140	143	143	156	156	153	155	110	110	345	345	170	170	149	149	333	333	243	243	152	152	336	336	260	260	152	152	185	185	141	143	104	104	288	288	169	169	143	143	266	266	228	228	89	89
KN 30	Y60	279	279	140	140	154	154	149	149	147	147	112	112	345	345	170	170	149	149	333	333	243	243	152	152	349	349	260	260	152	152	185	185	129	129	100	100	288	288	169	169	142	142	267	267	228	228	89	89
KN 31	Y61	277	277	152	152	133	133	149	149	149	149	112	112	345	345	170	170	145	145	333	333	243	243	152	152	347	347	260	260	159	159	185	185	156	160	100	100	294	294	168	168	142	142	265	265	230	230	95	95
KN 32	Y62	279	279	152	152	139	139	149	149	151	151	128	128	345	345	158	158	151	151	335	335	235	235	148	148	351	351	266	266	131	131	181	181	152	154	100	100	294	294	0	0	142	142	271	271	232	232	95	95
PHI 1	Y93	277	277	154	156	154	154	156	156	153	153	0	0	325	325	170	170	147	147	333	333	244	244	152	152	335	335	276	296	155	155	185	185	129	129	88	88	287	287	169	169	144	144	268	268	230	230	85	85
PHI 2	Y94	279	279	154	156	120	120	152	152	159	159	124	124	345	345	170	170	154	154	333	333	239	239	148	148	349	349	0	0	136	136	181	181	152	152	100	100	293	293	169	169	142	142	272	272	230	230	93	93
PHI 3	Y95	279	279	154	156	158	158	152	152	151	151	112	112	345	345	174	174	151	151	333	333	235	235	152	152	349	349	0	0	132	132	181	181	152	156	100	100	293	293	169	169	142	142	272	272	230	230	97	97
PHI 4	Y96	277	277	154	156	154	154	166	166	153	155	110	110	349	349	189	191	147	147	333	333	243	243	152	152	335	335	0	0	153	153	185	185	148	148	100	100	288	288	169	169	144	144	266	272	228	228	85	85
PHI 5	Y97	279	279	156	158	156	156	156	156	155	155	0	0	345	345	174	174	157	157	333	333	239	239	148	148	358	358	0	0	136	136	181	181	152	152	90	90	293	293	163	163	142	142	272	272	230	230	93	93
PHI 6	Y98	279	279	156	158	156	156	152	152	155	157	114	114	345	345	170	170	151	151	333	333	235	235	148	148	349	349	0	0	136	136	191	191	160	160	100	100	293	293	169	169	142	142	272	272	230	230	93	93
PHI 7	Y99	279	279	142	142	139	139	150	150	151	151	114	114	345	345	170	170	151	151	333	333	236	236	148	148	349	349	0	0	134	134	181	181	152	156	90	90	293	293	169	169	142	142	272	272	230	230	93	93
PHI 8	Y100	279	279	154	158	120	120	152	152	151	153	128	130	345	345	174	174	151	151	333	333	235	235	152	152	347	347	0	0	0	0	181	181	152	154	100	100	293	293	169	169	142	142	272	272	230	230	97	97
PHI 9	Y101	279	279	154	158	120	120	152	152	159	159	114	114	345	345	170	170	151	151	333	333	235	235	148	148	349	349	252	274	132	132	181	181	152	156	100	100	293	293	169	169	142	142	272	272	230	230	93	93
PHI 10	Y102	279	279	152	152	158	158	152	152	151	153	114	114	345	345	170	170	151	151	333	333	235	235	0	0	349	349	0	0	136	136	181	181	152	156	100	100	293	293	169	169	142	142	272	272	230	230	97	97
PHI 11	Y103	279	279	152	158	120	120	149	149	159	159	128	128	345	345	174	174	151	151	333	333	235	235	148	148	349	349	0	0	132	132	181	181	152	156	100	100	293	293	169	169	142	142	272	272	230	230	93	93
PHI 12	Y104	279	279	142	142	120	120	149	149	159	159	114	114	345	345	170	170	153	153	333	333	235	235	148	148	349	349	0	0	136	136	181	181	152	154	100	100	293	293	169	169	142	142	272	272	230	230	95	95
PHI 13	Y105	279	279	154	156	120	120	152	152	141	143	114	114	345	345	168	168	153	153	333	333	235	235	148	148	356	356	0	0	136	136	181	181	145	149	90	90	293	293	169	169	173	173	272	272	230	230	93	93
PHI 14	Y106	279	279	152	152	156	156	152	152	151	151	114	114	345	345	174	174	151	151	333	333	235	235	152	152	349	349	0	0	134	134	181	181	152	156	100	100	293	293	169	169	142	142	272	272	230	230	95	95
PHI 15	Y107	279	279	152	152	156	156	149	149	147	147	126	126	345	345	170	170	153	153	333	333	235	235	152	152	351	351	0	0	134	134	181	181	152	156	100	100	293	293	169	169	142	142	272	272	230	230	97	97
PHI 16	Y108	279	279	152	152	154	154	152	152	155	157	132	134	345	345	174	174	151	151	333	333	235	235	152	152	349	349	256	296	132	132	181	181	156	160	100	100	293	293	169	169	142	142	272	272	230	230	95	95
PHI 17	Y109	279	279	154	156	154	154	156	156	153	153	112	112	325	325	170	170	147	147	333	333	243	243	152	152	335	335	256	276	132	132	185	185	156	160	104	104	293	293	169	169	143	143	266	266	228	228	85	85
PHI 18	Y100	279	279	154	156	156	156	152	152	153	153	120	120	345	345	170	170	153	153	333	333	235	235	148	148	349	349	0	0	132	132	191	191	152	154	90	90	293	293	169	169	142	142	272	272	230	230	95	95
PHI 19	Y111	279	279	152	152	120	120	152	152	151	151	114	114	345	345	170	170	151	151	333	333	235	235	152	152	351	351	0	0	132	132	181	181	152	156	98	98	293	293	169	169	142	142	272	272	230	230	97	97
PHI 20	Y112	279	279	158	160	120	120	149	149	155	157	114	114	345	345	168	168	151	151	333	333	235	235	148	148	347	347	0	0	132	132	181	181	156	160	100	100	293	293	163	163	142	142	272	272	230	230	95	95
JV 1	Y01	281	281	154	158	154	154	152	152	147	147	114	114	345	345	158	158	151	151	0	0	235	235	148	148	349	349	268	268	0	0	181	181	152	156	90	90	0	0	169	169	154	172	272	272	230	230	93	93
JV 2	Y02	279	281	140	140	120	120	152	152	147	147	114	114	345	345	158	158	151	151	333	333	235	235	148	148	349	349	268	268	135	140	181	181	129	152	90	90	294	294	169	170	142	142	272	272	230	230	93	95
JV 3	Y03	279	279	154	158	120	120	152	152	149	149	114	114	345	345	158	158	153	153	333	333	235	235	148	148	351	351	266	266	134	134	181	181	152	156	100	100	294	294	163	163	142	142	271	271	230	230	97	97
JV 4	Y04	279	279	150	150	139	139	152	152	145	145	116	116	345	345	158	158	153	153	333	333	235	235	148	148	351	351	266	266	136	136	181	181	148	152	90	90	294	294	169	169	154	172	272	272	234	234	93	93
JV 5	Y05	279	279	140	140	120	120	156	156	155	157	112	112	345	345	186	186	151	151	333	333	271	271	152	152	335	335	278	278	152	152	187	187	129	133	104	104	291	291	169	169	142	142	267	267	228	228	93	93
JV 6	Y113	279	279	152	152	120	120	152	152	143	143	114	114	345	345	170	170	0	0	333	333	0	0	148	148	356	356	0	0	134	134	185	185	129	133	0	0	293	293	169	169	144	144	272	272	230	230	93	93
JV 7	Y114	279	279	150	152	156	156	152	152	151	151	110	110	345	345	170	170	0	0	333	333	0	0	148	148	353	353	0	0	136	136	191	191	147	151	0	0	293	293	169	169	142	142	272	272	230	230	0	0
JV 8	Y115	281	281	140	140	155	155	166	166	153	155	110	110	345	345	170	170	0	0	333	333	0	0	152	152	335	335	0	0	153	153	185	185	160	164	0	0	287	287	169	169	142	142	266	266	230	230	85	85
JV 9	Y116	281	281	140	140	131	131	166	166	135	157	110	110	325	325	170	170	0	0	333	333	0	0	152	152	335	335	276	296	153	153	185	185	160	164	0	0	287	287	169	169	142	142	266	266	228	228	89	89
BN 1	Y21	279	283	150	150	131	155	149	149	147	149	116	116	329	345	158	174	149	151	333	341	235	235	148	154	349	353	266	268	131	136	181	189	136	143	100	100	294	294	163	169	143	143	271	271	230	230	93	99
BN 2	Y22	279	279	142	142	156	156	152	152	147	147	126	126	345	345	158	158	151	151	341	341	235	235	148	148	349	349	266	266	138	138	189	189	136	140	100	100	294	294	162	162	143	143	271	271	232	232	93	93
BN 3	Y23	277	277	140	140	155	155	166	166	157	159	104	104	345	345	178	178	145	145	333	333	243	243	152	152	335	335	260	260	152	152	185	185	160	164	94	94	288	288	169	169	142	142	267	267	230	230	95	95
BN 4	Y24	279	279	146	146	120	120	152	152	0	0	114	114	345	345	158	158	151	151	333	333	235	235	0	0	351	351	266	266	136	136	181	181	129	133	100	100	294	294	163	163	144	144	271	271	232	232	93	93
BN 5	Y25	279	279	146	146	120	120	152	152	147	147	116	116	345	345	158	158	149	149	333	333	235	235	148	148	349	349	266	266	136	136	189	189	129	133	100	100	294	294	163	163	144	144	272	272	232	232	93	93
BN 6	Y26	279	279	146	146	139	139	152	152	151	151	126	126	345	345	168	168	151	151	341	341	235	235	148	148	351	351	266	266	132	132	189	189	146	150	100	100	293	294	162	162	154	172	272	272	232	232	99	99
BN 7	Y27	279	279	154	158	139	139	152	152	155	155	110	110	345	345	168	168	151	151	341	341	235	235	148	148	353	353	266	266	132	132	183	183	146	150	100	100	293	294	162	163	142	172	272	272	232	232	93	93
BN 8	Y28	279	279	154	156	120	120	152	152	139	139	130	130	345	345	170	178	151	151	341	341	235	235	150	150	351	351	264	264	136	136	185	185	136	140	100	100	293	293	153	153	143	154	272	272	230	230	93	93
BN 9	Y29	279	279	146	146	156	156	151	151	149	149	126	126	345	345	168	168	151	151	0	0	235	235	148	148	351	351	268	268	0	0	181	189	143	147	100	100	0	0	163	169	154	170	271	271	232	232	93	93
BN 10	Y30	277	277	142	142	154	154	166	166	155	157	112	112	345	345	170	170	145	145	333	333	243	243	152	152	335	335	260	260	150	150	189	189	164	168	94	94	288	288	162	163	142	142	267	267	228	228	95	95
SW 1	Y63	279	279	146	146	139	139	149	149	155	157	126	126	345	345	168	168	151	151	333	333	235	235	148	148	357	357	268	268	138	138	181	181	129	129	104	104	294	294	163	163	143	172	271	271	230	230	93	93
SW 2	Y64	279	279	142	142	139	139	152	152	155	157	116	116	345	345	158	158	151	151	333	333	235	235	148	148	349	349	268	268	137	137	189	189	145	145	100	100	294	294	163	163	143	173	271	271	230	230	93	93
SW 3	Y65	279	279	146	146	139	139	152	152	155	157	126	126	345	345	168	168	151	151	333	333	235	235	148	148	351	351	266	266	136	136	189	189	145	145	100	100	294	294	163	163	135	173	271	271	230	230	93	93
SW 4	Y66	279	279	144	144	156	156	152	152	155	165	114	114	345	345	174	174	151	151	341	341	235	235	148	148	351	351	266	266	135	135	191	191	145	145	102	102	293	293	163	163	173	173	272	272	230	230	93	93
SW 5	Y67	279	279	154	158	0	0	149	149	0	0	126	126	345	345	174	174	153	153	333	333	235	235	148	148	347	347	266	266	131	131	191	191	152	154	90	90	293	293	163	163	142	142	271	271	0	0	0	0
SW 6	Y68	279	279	156	158	139	139	152	152	155	155	126	126	345	345	158	158	151	151	341	341	235	235	148	148	349	349	268	268	137	137	181	181	129	129	100	100	293	293	162	163	142	142	271	271	230	230	97	97
SW 7	Y69	279	279	154	158	156	156	152	152	155	159	114	114	345	345	158	158	151	151	341	341	235	235	148	148	347	347	266	266	131	131	189	189	145	145	90	90	294	294	163	163	142	142	271	271	230	230	93	93
SW 8	Y70	279	279	146	146	156	156	152	152	155	159	114	114	345	345	174	174	151	151	333	333	235	235	148	148	351	351	268	268	131	131	181	181	152	156	90	90	294	294	163	163	142	142	271	271	230	230	93	93
SW 9	Y71	279	279	146	146	156	156	152	152	149	149	114	114	345	345	158	158	153	153	341	341	235	235	148	148	357	357	268	268	131	131	183	183	129	129	90	90	294	294	163	163	142	142	271	271	230	230	93	93
SW 10	Y72	279	279	150	150	156	156	149	149	149	149	114	114	345	345	158	158	151	151	341	341	235	235	148	148	349	349	268	268	131	131	181	181	129	129	90	90	294	294	163	163	142	142	271	271	230	230	93	93
SW 11	Y73	279	279	142	142	156	156	152	152	149	149	126	126	345	345	174	174	151	151	341	341	235	235	148	148	351	351	268	268	131	131	183	183	143	143	100	100	294	294	163	163	173	173	271	271	230	230	95	95
SW 12	Y74	279	279	142	142	156	156	152	152	149	149	126	126	345	345	174	174	151	151	341	341	235	235	148	148	351	351	268	268	131	131	183	183	143	143	100	100	294	294	163	163	143	173	271	271	230	230	95	95
SW 13	Y75	279	279	154	158	156	156	152	152	155	159	114	114	345	345	158	158	151	151	341	341	235	235	148	148	347	347	266	266	132	132	189	189	145	145	90	90	293	293	163	163	142	142	271	271	230	230	93	94
SW 14	Y76	279	279	150	150	120	120	149	149	149	149	114	114	345	345	158	158	151	151	333	333	235	235	148	148	349	349	266	266	135	135	181	181	128	128	90	90	293	293	163	163	143	143	271	271	230	230	95	95
SW 15	Y77	279	279	142	142	156	156	149	149	161	163	114	114	345	345	158	158	151	151	333	333	235	235	148	148	347	347	266	266	138	138	189	189	145	145	100	100	293	294	163	163	154	173	271	271	230	230	93	93
